# Supplementary material for: DYRK1A regulates B cell acute lymphoblastic leukemia through phosphorylation of FOXO1 and STAT3
Source: JCI journal article supplement (doi:10.1172/jci135937), 2021-01-03
Supplement: sd1 [file 1]

**DYRK1A regulates B cell acute lymphoblastic leukemia through phosphorylation of  
FOXO1 and STAT3**

Rahul S Bhansali, Malini Rammohan, Paul Lee, Anouchka Laurent, Qiang Wen, Praveen Suraneni, Bon Ham Yip, Yi-Chien Tsai, Silvia Jenni, Beat Bornhauser, Aurélie Siret, Corinne Fruit, Alexandra Pacheco-Benichou, Ethan Harris, Thierry Besson, Benjamin J Thompson, Young Ah Goo, Nobuko Hijiya, Maria Vilenchik, Shai Izraeli, Jean-Pierre Bourquin, Sebastien Malinge, and John D Crispino\*

**Corresponding Author:**

John D Crispino  
St. Jude Children's Research Hospital  
262 Danny Thomas Place, MS341  
Memphis, TN 38105  
Phone: 901-595-7511  
Email: j-crispino@northwestern.edu; john.crispino@stjude.org

## Supplementary Methods

**Cancer Cell Line Encyclopedia (CCLE) Gene Expression Analysis.** CCLE (Broad Institute, Cambridge, MA)(21) was searched for “DYRK1A,” “FOXO1,” and “STAT3.” Data from “mRNA Expression (RNAseq)” and “Copy Number” datasets were extracted and analyzed for differential gene expression.

**St. Jude GenomePaint Query.** The Pan-ALL dataset in St. Jude GenomePaint(21) was queried for *DYRK1A*, *FOXO1*, and *STAT3*. Kaplan-Meier curves were plotted by stratification into quartiles based on gene expression.

**Colony replating assays.** For colony replating assays, bone marrow was harvested from C57BL/6 mice 4-6 weeks of age. B cell precursors were isolated by collecting the B220-positive and lineage-negative fraction using the mouse hematopoietic progenitor (Stem) Cell Enrichment Set (BD) with biotin anti-mouse lineage panel consisting of TER-119, CD11b, Ly-6G/Ly-6C (Gr-1), and CD3e biotin-conjugated monoclonal antibodies. 200e3 cells transduced with MIGR1-*Dyrk1a* or MIGR1 were plated into M3630 medium and were incubated at 37°C. At 1 week timepoints, colonies were counted, harvested, and replated in equal quantities to assess for clonality.

**Complete blood counts.** Blood (100μL) was collected from the tail vein in EDTA-coated tubes and analyzed by a Hemavet 850 complete blood counter.

**Cell culture.** B-ALL cell lines (MHH-CALL-4, MHH-CALL-2, MUTZ-5, 697, Nalm-6, REH, RCH-ACV) were purchased from Deutsche Sammlung von Mikroorganismen und Zellkulturen (DSMZ), confirmed to be free of mycoplasma contamination by PCR, and authenticated by a human 9-marker STR profile test (IDEXX BioResearch). Cells were cultured in RPMI supplemented with 10% FBS (697, Nalm-6, RCH-ACV) or 20% FBS (MHH-CALL-4, MHH-CALL-2, MUTZ-5, REH), 2mM L-glutamine, and penicillin/streptomycin (GIBCO). Human Ph-like ALL samples were obtained from the PROPEL repository (St. Jude Children's Hospital). Briefly, 1e6 cells were transplanted into NSG mice. After 1 month of expansion, leukemic cells were harvested from bone marrow using human CD19 and human CD45 selection EasySep kits (Stem Cell Technologies) and then cultured ex vivo. For pre-B cell cultures, bone marrow cells were collected from C57BL/6 mice. Lineage-negative cells were negatively selected from suspension of bone marrow using the EasySep kit (Stem Cell Technologies) and grown in the presence of OP9 mouse stromal cells (ATCC) in cytokine-supplemented (10ng/ $\mu$ L mSCF, 5ng/ $\mu$ L hFlt3, and 1ng/ $\mu$ L mIL7 [PeproTech]) OP9 co-culture media (Alpha-MEM supplemented with 10% FBS [HyClone], 2mM L-glutamine, 1x Primocin [Invivogen], and Gentamicin [GIBCO]). Cells were passaged every 4 days, and confirmation of pre-B cell immunophenotype was performed by flow cytometric identification of the IgM<sup>-</sup>, B220<sup>+</sup>, CD43<sup>low/-</sup> population. OP9 cells were cultured alone in Alpha-MEM supplemented with 20% FBS (HyClone), 2mM L-glutamine, 1x Primocin (Invivogen), Gentamicin (GIBCO).

For drug treatment experiments, pre-B cells were harvested and passed through a 40 $\mu$ M filter to remove OP9 stromal cells and equilibrated to cytokine-supplemented (10ng/ $\mu$ L mSCF, 5ng/ $\mu$ L hFlt3, and 5ng/ $\mu$ L mIL7 [PeproTech]) pre-B cell media (DMEM supplemented with 10% FBS

[Hyclone], 2mM L-glutamine, 10mM Hepes, 1mM sodium pyruvate, 1x Primocin [InvivoGen] and 55 $\mu$ M beta-mercaptoethanol) and passaged every 2 days.

**qRT-PCR.** Total RNA was isolated from murine leukemic cells, murine pre-B cells, or B-ALL cell lines (Nalm-6 and 697) using RNeasy kits (QIAGEN) and reverse transcribed using SuperScript III First Strand Synthesis Kits (Life Technologies). Real-time PCR was performed using PerfeCTa SYBR Green (Quanta Biosciences) and gene-specific primers. Data were quantified using  $2^{-\Delta\Delta C_t}$  method.

**Western blotting.** Whole cell lysis was performed with TENT buffer (50mM Tris, pH 8.0, 2mM EDTA, 150mM NaCl, 1% Triton X-100) supplemented with 2mM NaF, 2mM NaVO<sub>3</sub>, 2mM Sodium Pyrophosphate, 2mM beta-glycerophosphate, and 1x cOmplete protease inhibitor cocktail (Roche) or RIPA buffer (ThermoFisher Scientific) supplemented with Halt Protease Inhibitor Cocktail (ThermoFisher Scientific) for 30 minutes on ice. Debris was cleared by centrifugation at 21000g for 10 minutes at 4°C. Low-input Western blots were performed as previously described(83) by sorting 50e3 cells directly into 10% TCA and incubating on ice for 15 minutes. Lysates were clarified by centrifugation and washed twice in -20°C acetone. Pellets were resuspended in 9M Urea, 1% Triton X-100, and 1% DTT. Subcellular fractionation was performed by lysis with Harvest buffer (10mM HEPES, pH 7.9, 50mM NaCl, 0.5M Sucrose, 0.1mM EDTA, and 0.5% Triton X-100) supplemented with 1mM DTT, 2mM NaF, 2mM NaVO<sub>3</sub>, 2mM Sodium Pyrophosphate, 2mM beta-glycerophosphate, and 1x cOmplete protease inhibitor cocktail (Roche) for 10 minutes on ice. Nuclei were pelleted at 720g for 10 minutes and supernatant (cytoplasmic fraction) was cleared by centrifugation. Nuclear/chromatin-bound



pellet was washed in Buffer A (10mM HEPES, pH 7.9, 10mM KCl, 0.1mM EGTA, and 0.1mM EDTA) supplemented with 1mM DTT, 2mM NaF, 2mM NaVO<sub>3</sub>, 2mM Sodium Pyrophosphate, 2mM beta-glycerophosphate, and 1x cOmplete protease inhibitor cocktail (Roche). Pellet was then lysed in Buffer C (10mM HEPES, pH 7.9, 500nM NaCl, 0.1mM EGTA, 0.1mM EDTA, 0.1% NP-40, and 250U/mL Benzonase) supplemented with 1mM DTT, 2mM NaF, 2mM NaVO<sub>3</sub>, 2mM Sodium Pyrophosphate, 2mM beta-glycerophosphate, and 1x cOmplete protease inhibitor cocktail (Roche) by vortexing for 15 minutes at 4°C. Lysates were cleared by centrifugation and supernatant (nuclear/chromatin-bound fraction) was kept for use. Lysates were denatured in LDS sample loading buffer (Life Technologies) at 95°C for 5 minutes and electrophoresed on 4-15% Mini-Protean TGX gels (BioRad). Proteins were transferred to PVDF membranes (EMD Millipore) and probed with primary antibodies against DYRK1A, Cyclin D3, phospho-Cyclin D3 T283, FOXO1, phospho-FOXO1 S329, TBP, phospho-STAT3 S727, phospho-STAT3 Y705, STAT3 and HSC70. Actin was detected using HRP-conjugated primary antibody. All Western blots were detected with HRP-conjugated secondary antibodies and visualized with ECL substrate (GE Healthcare) or SuperSignal West Substrate (ThermoFisher Scientific) using HyBlot CL radiography film (Denville), with the exception of panels 4B, 4C, 7B, and 7C, which were detected with IRDye secondary antibodies (LI-COR) and visualized with Odyssey CLx Imaging System (LI-COR). Antibodies are described in detail in Supplementary Table S9. Densitometry values were calculated using ImageJ software.

**Retroviral production and transduction.** Platinum-E or Platinum-A cells (Cell Biolabs) were grown to 70-80% confluence in antibiotic-free medium in 10-cm dishes for mouse or human cell experiments, respectively. They were transfected with 10µg of retroviral plasmid (MIGR1,

MIGR1-*Dyrk1a*<sup>WT</sup>, MIGR1-*Dyrk1a*<sup>K188R</sup>, MIGR1-*BCR-ABL* [p190], MIGR1-*Cre*, MSCV-puro, MSCV-puro-*STAT3*<sup>WT</sup>, MSCV-puro-*STAT3*<sup>S727A</sup>, MSCV-puro-*STAT3*<sup>S727D</sup>, MSCV-puro-*STAT3*<sup>S727E</sup>) using Xtreme Gene 9 (Roche). Fresh medium was replaced after 12 hours, and viral supernatant was collected at 24 and 48 hours after transfection and 0.45μM filtered to remove cell debris. Virus was concentrated by adding 320μg/mL polybrene and centrifugation at 10000g for 10 minutes at 4°C. Cells were transduced by adding concentrated virus resuspended in complete culture medium and 25mM Hepes and centrifugation at 2500rpm for 90 minutes at 32°C. Cells were then incubated for an additional 4-8 hours at 37°C before replacing medium.

**Lentiviral production and transduction for shRNA mediated knockdown.** 293T cells (ATCC) were grown to 70-80% confluence in antibiotic-free medium in 10-cm dishes. Cells were then transfected in 1:9:9 ratio with packaging plasmids (pMD2.G, psPAX2) and pTRIPZ inducible shRNAs made available by Dharmacon (scrambled, DYRK1A\_1 [V3THS\_376671] or DYRK1A\_2 [V3THS\_376672]) using Xtreme Gene 9 (Roche). Fresh medium was replaced after 12 hours, and viral supernatant was collected at 24 and 48 hours after transfection and 0.45μM filtered to remove cell debris. Viral particles were concentrated by ultracentrifugation at 100,000g for 1 hour and 30 minutes at 4°C. Hematopoietic cells were transduced by adding concentrated virus resuspended in complete culture medium with 25mM Hepes and 10μg polybrene and centrifugation at 2500rpm for 90 minutes at 32°C twice, with an hour of incubation at 37°C between the spins. shRNA expression was induced through addition of 0.5μg/μl doxycycline for 3 days, after which cells were harvested for analysis.

**CRISPR/Cas9 targeting of *DYRK1A*.** To achieve gene knockout, 2e6 MUTZ-5 cells were mixed with 450pmol of *DYRK1A*-specific sgRNAs (predesigned Gene Knockout Kit v2, Synthego) and 50pmol of Cas9 2NLS Nuclease (Synthego). Same number of cells were also mixed with 450pmol of non-targeting sgRNA (Synthego) and 50pmol of Cas9 2NLS Nuclease to serve as a control. The cells were then resuspended in 100ul of T Buffer (ThermoFisher Scientific) for electroporation in the Neon Transfection System (ThermoFisher Scientific). Cells were loaded in 100ul tips and electroporated according to the manufacturer's instructions using the setting of 1350 volts, 30ms width, and 1 pulse. Following electroporation, cells were recovered in RPMI (ThermoFisher Scientific) containing 20% FBS (ThermoFisher Scientific) for 24 hours before undergoing another round of electroporation to increase the knockout efficiency. Cells were then harvested for Western blotting 24 hours later.

**In vitro kinase assay.** Nonradioactive kinase assays were performed as previously described(16, 84). 293T cells were transfected with 1098 pcDNA GFP FKHR WT or S329A and lysed 2 days later for immunoprecipitation with GFP-Trap®-MA beads (ChromoTek). Bead-bound FOXO1 was washed extensively and then added to kinase reactions containing recombinant GST-hDYRK1A (ThermoFisher Scientific), ATP-gamma-S (Abcam), and kinase assay buffer (40mM Tris, pH 7.5, 10mM MgCl<sub>2</sub>, and 50mM NaCl). Reactions were mixed in a ThermoMixer (Eppendorf) at 30°C for 45 minutes. 2.5mM P-nitrobenzyl mesylate (PNBM; Abcam) was added to alkylate thiophosphates. Western blot was then performed on reactions and probed with anti-thiophosphate ester antibody.

**Mitochondrial Fractionation.** 20e6 cells were harvested for mitochondria isolation using Mitochondria Isolation Kit for Mammalian Cells (8984, ThermoFisher Scientific). Isolated mitochondria were directly lysed in SDS-PAGE buffer for western blot and subsequent analysis was performed as described above.

**Fluorescence microscopy.** The plasmid 1098 pcDNA GFP FKHR was a gift from William Sellers(85) (Addgene plasmid #9022; <http://n2t.net/addgene:9022>; RRID:Addgene 9022). Site-directed mutagenesis was performed using QuikChange kits (Agilent) and confirmed with DNA sequencing. The plasmids were transiently transfected into primary murine pre-B cells using Cell Line Nucleofector Kit V and Nucleofector 2b Device (Lonza) with program V-001. Transfected cells were cultured for 48 hours and then treated with 2.5 $\mu$ M EHT 1610 or DMSO for 4 hours before fixation and 10 $\mu$ g/mL Hoechst 33342 for 1 hour before fixation. Cells were then attached to the cover slip coated with 25  $\mu$ g/ml of fibronectin for 1hr at 37°C. Cells were then stained with Hoechst (Sigma-Aldrich) for 1hr, washed with phosphate buffer saline and fixed with 4% paraformaldehyde for 30 minutes. Fluorescent images were obtained using the Nikon A1R+ confocal microscope under a 60 $\times$  Plan-Apochromat oil immersion lens.

**Global phosphoproteomics.** Wild-type murine pre-B cells were cultured as described in Methods. Cells were treated for 2 hours with 2 $\mu$ M EHT 1610 or DMSO in the presence of MG-132 (Sigma-Aldrich). Cells were pelleted and washed in PBS. Pellets were then resuspended in Urea lysis buffer (8M Proteomics Grade Urea [Sigma-Aldrich], 20mM Hepes [pH 8.0], 1 $\mu$ M sodium orthovanadate, 2 $\mu$ M sodium pyrophosphate, and 2 $\mu$ M beta-glycerophosphate). Suspensions were then sonicated with a setting of 5 with 15-20 bursts at 2 seconds on/2 seconds

off. The lysate was collected following centrifugation, and 1mg of protein from each sample was used for digestion followed by phosphopeptide enrichment. The samples were reduced with DTT (5mM, 45°C, 30 min) followed by alkylation with 2-chloroacetamide (65mM, room temperature, 30 min). Samples were diluted with 100mM ammonium bicarbonate to reduce the urea concentration to <1.2M. Digestion was initiated with the addition of trypsin (1:50 W:W ratio; Promega) and incubated overnight at 37°C with constant shaking on a Thermomixer. Digestion was stopped by adding TFA (final concentration of 0.1%). Samples were desalted using SepPak C18 cartridges (Waters) following manufacturer's protocol and completely dried using vacufuge (Eppendorf).

Titanium dioxide (TiO<sub>2</sub>)-based metal oxide affinity chromatography was used for phosphopeptide enrichment. The Titansphere Phos-TiO kit was purchased from GL Sciences Inc., and phosphopeptide enrichment was performed according to the manufacturer's protocol with minor modifications. Briefly, a spin tip column packed with 6mg of TiO<sub>2</sub> beads was conditioned with buffer A (0.5% TFA/80% acetonitrile) and equilibrated with buffer B (25% lactic acid/0.5% TFA/60% acetonitrile solution). Tryptic peptides were dissolved in buffer B and loaded onto the column. After several washings with buffers A and B to remove non-phosphorylated peptides, phosphopeptides were eluted serially with 100µl each of 5% ammonium hydroxide and 5% pyrrolidine solutions. Eluents were combined and cleaned up using SepPak C18 cartridge (Waters) and completely dried.

Tandem Mass Tag labeling: The Tandem Mass Tag (TMT) labeling was performed using TMT-6plex isobaric labeling kit (ThermoFisher Scientific). The labeling of the sample was performed according to the manufacturer's protocol. Briefly, dried phosphopeptides were solubilized with 100µl of 0.1M TEAB solution. Samples 1-6 were labeled with TMT channels.

TMT reagents were reconstituted in 41 µl of anhydrous acetonitrile and peptides were transferred to the TMT reagent vial and incubated at room temperature for 1 hour. The reaction was quenched by adding 8 µl of 5% hydroxylamine and incubating it for further 15 minutes. The samples were then combined and dried. Prior to MS analysis, two-dimensional separation of the samples was performed. For the 1<sup>st</sup> dimension, an offline fractionation using high pH reverse phase fractionation kit into 8 fractions was performed following the manufacturer's protocol (Pierce, Cat #84868). Fractions were dried and reconstituted in 10 µl of loading buffer (0.1% formic acid and 2% acetonitrile). Liquid Chromatography-mass spectrometry analysis (LC-Multinotch MS3): Orbitrap Fusion (ThermoFisher Scientific) and RSLC Ultimate 3000 nano-UPLC (Dionex) were used to acquire the data. 2 µl of each fraction was resolved in the 2<sup>nd</sup> dimension on a nano-capillary reverse phase column (Acclaim PepMap C18, 2 micron, 75 µm i.d. x 25 cm, ThermoFisher Scientific) using a 0.1% formic/acetonitrile gradient at 300 nl/minute (2-22% acetonitrile in 50 minutes; 22-32% acetonitrile in 25 minutes; 10 minutes wash at 90% followed by 25 minutes re-equilibration) and directly sprayed on to Orbitrap Fusion using EasySpray source (ThermoFisher Scientific). Mass spectrometer was set to collect one MS1 scan (Orbitrap; 120K resolution; AGC target  $2 \times 10^5$ ; max IT 100 ms) followed by data-dependent, "Top Speed" (3 seconds) MS2 scans (High-energy C-trap dissociation; 60K resolution; NCD 35; AGC  $5 \times 10^4$ ; max IT 250 ms).

Proteome Discoverer (v1.4 ThermoFisher Scientific) was used for data analysis. MS2 spectra were searched against mouse protein database (release 2014-01; 51629 sequences including Common Contaminant list) using the following search parameters: MS1 and MS2 tolerance were set to 10 ppm and 0.1 Da, respectively; carbamidomethylation of cysteines (57.02146 Da) and TMT labeling of lysine and N-termini of peptides (229.16293 Da) were

considered static modifications; oxidation of methionine (15.9949 Da), deamidation of asparagine and glutamine (0.98401 Da) and phosphorylation on serine, threonine and tyrosine were considered variable. Identified proteins and peptides were filtered to retain only those that passed  $\leq 1\%$  FDR threshold. PhosphoRS and Reporter ion quantifier modules of Proteome Discoverer were used to determine the phosphosite localization probabilities and extract reporter ion-based quantitation, respectively.

**Kinase assay-linked phosphoproteomics.** Kinase assay procedure was modified from the kinase assay-linked phosphoproteomics method(86, 87) with changes described below. Murine pre-B cells pellets were collected and resuspended in a lysis buffer containing 8M proteomics grade Urea (Sigma-Aldrich), 50mM Tris-HCl, 75mM NaCl, and 25U/mL Benzonase (EMD Millipore). Suspensions were sonicated with a setting of 5 for 15-20 bursts at 2 seconds on/2 seconds off. Protein concentration in the supernatants was determined by a 660nm assay (ThermoFisher Scientific).

Four milligrams of total protein per sample were prepared for phosphoproteomics analysis. Lysates were treated with 1mM 5'-(4-fluorosulfonylbenzoyl)adenosine (FSBA) (1 hour, 30C) to inhibit endogenous kinase activity. Excess FSBA was washed out using 3 kDa Amicon filters (EMD Millipore). Samples were then incubated at 50°C with 5mM DTT for 30 minutes, cooled to room temperature, and alkylated with 15mM iodoacetamide for 60 minutes in the dark. First digestion was performed with rLys-C (1:200 w:w, Promega) overnight at 37°C in order to maintain the DYRK1A phosphorylation motif with contains arginine. 0.5% TFA was added to halt the reaction and debris was cleared. Samples were desalted using SepPak C18 cartridges (Waters) with two elution steps using 0.1% TFA in 50% Acetonitrile and 0.1% TFA in

80% Acetonitrile. Eluents were completely dried with SpeedVac centrifugation. Peptides were incubated with Lambda phosphatase (NEB) for 2 hours at 5U/ $\mu$ g. Phosphatase was deactivated by heating for 1 hour at 65°C in the presence of 10mM sodium orthovanadate, 50mM sodium fluoride, 2mM beta-glycerophosphate, and 2mM sodium pyrophosphate. Kinase assay was then performed by adding 1x Kinase buffer (40mM Tris-HCl, 10mM MgCl<sub>2</sub>, 50mM NaCl), 250 $\mu$ M ATP, 1 $\mu$ g recombinant NFATc1 (Sigma-Aldrich), and  $\leq$ 1% protein weight recombinant DYRK1A (ThermoFisher Scientific) and incubated for 2.5 hours at 30°C. The reaction was quenched by adding EDTA to 20mM. A second digestion was performed with addition of acetonitrile to 10% followed by sequencing-grade trypsin (1:50 w:w, Promega), and the reaction was incubated overnight at 37°C. Complete digestion was confirmed by running aliquot on a Western blot and Imperial staining (ThermoFisher Scientific). Samples were desalted using SepPak C18 cartridges (Waters) with two elution steps using 0.1% TFA in 50% Acetonitrile and 0.1% TFA in 80% Acetonitrile. Eluents were completely dried with SpeedVac centrifugation.

Phosphopeptides were enriched using bulk 5 $\mu$ m Titanosphere TiO<sub>2</sub> beads (GL Sciences) following the procedure previously described with minor modifications(88, 89). Desalted peptides from 4 mg of lysate were resuspended in a solution of 65% ACN, 2% TFA, and saturated glutamic acid. Each sample was mixed with 3mg of TiO<sub>2</sub> beads and shaken for 20 minutes at room temperature. Beads with bound phosphopeptides were washed by shaking twice in 65% ACN, 0.5% TFA for 10 minutes, then washed twice more in 65% ACN, 0.1% TFA for another 10 minutes. Phosphopeptides were eluted by shaking 20 minutes in 300 mM NH<sub>4</sub>OH/50% ACN, then twice with 500 mM NH<sub>4</sub>OH/60% ACN. The eluates from these three steps were combined and acidified with formic acid (FA).



High pH reverse-phase (HpRP) chromatography in a solid-phase extraction format was used to fractionate the phosphopeptides as previously described(88, 90). All solvents used for HpRP fractionation contained aqueous 10mM  $\text{NH}_4\text{HCO}_3$  at pH 10, with acetonitrile added as indicated. Peptides were pH-adjusted by adding 100 mM  $\text{NH}_4\text{HCO}_3$  to a final pH of 10, then loaded onto hydrophilic-lipophilic balanced (HLB) reversed-phase Sep-Pak cartridges (Waters). Cartridges were rinsed with 1% ACN /99% 10 mM ABC prior to eluting peptides with 5%, 10%, 15%, 20%, 25%, 30%, 35%, and 80% ACN. The eight fractions were concatenated to four fractions per sample. The 5% ACN fraction was mixed with the 25% ACN fraction, 10% ACN with 30% ACN, 15% ACN with 35% ACN, and 20% ACN with 80% ACN. After acidification with FA and vacuum drying to remove ACN, all fractions were desalted by C18 spin column (ThermoFisher Scientific) prior to LC-MS/MS analysis.

Desalted phosphopeptide-enriched fractions were resuspended in 5% ACN/0.1% FA. Nano LC-MS/MS analyses were performed with a 75  $\mu\text{m}$  x 10.5 cm PicoChip column packed with 3  $\mu\text{m}$  Reprosil C18 beads. A 150  $\mu\text{m}$  x 3 cm trap packed with 3 $\mu\text{m}$  beads was installed in-line. Solvent A consisted of 0.1% FA in water and solvent B was 0.1% in ACN. Peptides were trapped at 5  $\mu\text{L}/\text{minute}$  for 5 min, then separated at a flow rate of 300 nL/minute with a gradient from 5% to 30% B for 100 minutes. After a 4 minute ramp to 60% B, the column was washed at 95% B and re-equilibrated to 5% B with a total analysis time of 120 min.

The LC was coupled by electrospray to Q Exactive™ HF Hybrid Quadrupole-Orbitrap™ Mass Spectrometer (ThermoFisher Scientific) operating in data-dependent MS/MS mode with a top-15 method. Dynamic exclusion was set to 20 s and charge 1+ ions were excluded. MS<sup>1</sup> scans were collected from 300-2000  $m/z$  with resolving power equal to 60,000. The MS<sup>1</sup> AGC was set to  $3 \times 10^6$ . Precursors were isolated with a 2.0  $m/z$  isolation width, and the HCD normalized

collision energy was set to 30%. The MS<sup>2</sup> AGC was set to  $1 \times 10^5$  with the resolving power set at 30,000.

LC-MS results were searched in MaxQuant 1.6.0.16 against the SwissProt mouse database (version downloaded 10/2017) and a list of common contaminants. Cysteine carbamidomethylation was a fixed modification, and oxidized methionine was a variable modification. Phosphorylation of S, T, and Y residues were allowed for enriched fractions. Two missed cleavages were allowed, and Trypsin/P was selected as the enzyme. The “first search” precursor mass tolerance was set to 20 ppm, “main search” tolerance was set to 6 ppm, and fragment mass tolerance was set to 50 ppm. A 1% FDR was applied at the peptide and protein level.

Phosphopeptides were quantified in a label-free manner. MaxQuant-derived precursor intensities were converted to log<sub>2</sub>-scale fold changes. From these, robust z-scores (x-median fold change/median absolute deviation) were calculated to compare kinase treated cells vs. vehicle treated. Phosphorylation was considered confidently localized to a specific amino acid when scored with 75% probability or better.

**Bioinformatic analysis of phosphoproteomic studies.** For bioinformatic analysis, peptides with 1.5-fold change in phosphorylation were utilized. Both global and kinase assay-directed phosphoproteomics datasets were entered into String database for KMEANS clustering of interactome and identification of GO biological processes and KEGG pathway annotations.

## Supplementary References

82. Fischer U, Forster M, Rinaldi A, Risch T, Sungalee S, Warnatz HJ, et al. Genomics and drug profiling of fatal TCF3-HLF-positive acute lymphoblastic leukemia identifies recurrent mutation patterns and therapeutic options. *Nature genetics*. 2015;47(9):1020-9.
83. Signer RA, Qi L, Zhao Z, Thompson D, Sigova AA, Fan ZP, et al. The rate of protein synthesis in hematopoietic stem cells is limited partly by 4E-BPs. *Genes Dev*. 2016;30(15):1698-703.
84. Allen JJ, Li M, Brinkworth CS, Paulson JL, Wang D, Hubner A, et al. A semisynthetic epitope for kinase substrates. *Nat Methods*. 2007;4(6):511-6.
85. Nakamura N, Ramaswamy S, Vazquez F, Signoretti S, Loda M, and Sellers WR. Forkhead transcription factors are critical effectors of cell death and cell cycle arrest downstream of PTEN. *Mol Cell Biol*. 2000;20(23):8969-82.
86. Xue L, Arrington JV, and Tao WA. Identification of Direct Kinase Substrates via Kinase Assay-Linked Phosphoproteomics. *Methods Mol Biol*. 2016;1355:263-73.
87. Xue L, Wang WH, Iliuk A, Hu L, Galan JA, Yu S, et al. Sensitive kinase assay linked with phosphoproteomics for identifying direct kinase substrates. *Proc Natl Acad Sci U S A*. 2012;109(15):5615-20.
88. Schunter AJ, Yue X, and Hummon AB. Phosphoproteomics of colon cancer metastasis: comparative mass spectrometric analysis of the isogenic primary and metastatic cell lines SW480 and SW620. *Anal Bioanal Chem*. 2017;409(7):1749-63.
89. Yue X, Schunter A, and Hummon AB. Comparing multistep immobilized metal affinity chromatography and multistep TiO<sub>2</sub> methods for phosphopeptide enrichment. *Anal Chem*. 2015;87(17):8837-44.

90. Yue XS, and Hummon AB. Combination of multistep IMAC enrichment with high-pH reverse phase separation for in-depth phosphoproteomic profiling. *J Proteome Res.* 2013;12(9):4176-86.

## Supplementary Figures and Legends

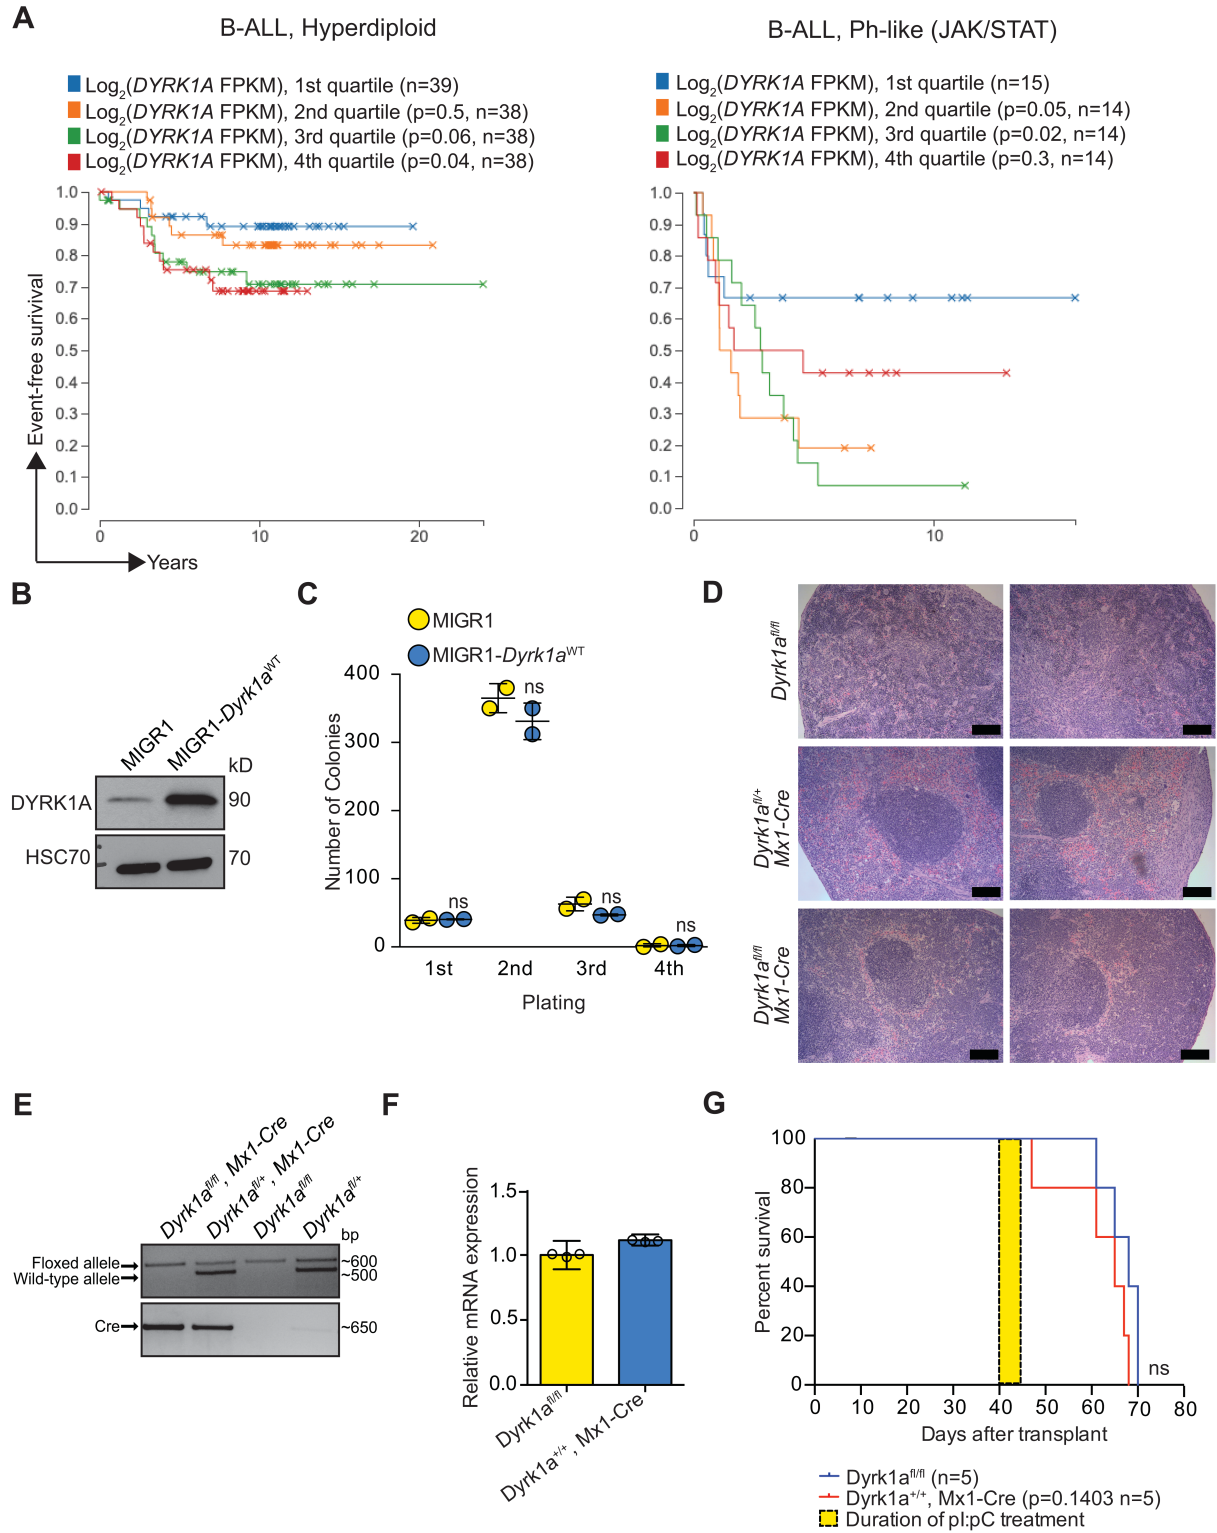

Supplementary Figure S1

**Supplementary Figure S1. DYRK1A is required for B-ALL survival in vivo.**

(A) Event-free survival analysis from St. Jude GenomePaint Pan-ALL cohort for patients with hyperdiploid (left) or Ph-like (JAK/STAT) (right) B-ALL. Data ordered by quartiles of *DYRK1A* expression. P-values and sample size (n) in panel key.

(B) Western blot showing total DYRK1A protein in Lin<sup>-</sup> B220<sup>+</sup> cells transduced with MIGR1 or MIGR1-*Dyrk1a*<sup>WT</sup>. Data representative of 2 biological replicates.

(C) Quantification of colonies during serial replating of cells derived from (B). Mean±SD.

(D) Spleens were harvested from mice described in Figures 1D-F, fixed in formalin, and paraffin-embedded for sectioning and Hematoxylin and Eosin staining. Scale bar: 200µm. Each panel represents a separate mouse per cohort.

(E) BCR-ABL-expressing leukemic cells were isolated from mouse bone marrow once moribund by fluorescence activated cell sorting (FACS) for GFP<sup>+</sup> cells. PCR was performed on genomic DNA from FACS-sorted cells using the primers detailed in Methods section to assess the presence or loss of the targeted allele in *Dyrk1a*<sup>fl/fl</sup>, *Dyrk1a*<sup>fl/fl</sup>/*Mx1-Cre* or *Dyrk1a*<sup>fl/+</sup>, *Dyrk1a*<sup>fl/+</sup>/*Mx1-Cre* mice.

(F) Mice were transplanted with BCR-ABL (p190) B-ALL cells with *Dyrk1a*<sup>fl/fl</sup> or *Dyrk1a*<sup>+/+</sup> with *Mx1-Cre* and treated with pI:pC for 2 weeks. Bar chart depicts *Dyrk1a* mRNA expression from qRT-PCR of sorted CD19<sup>+</sup> GFP<sup>+</sup> cells from murine bone marrow. CD19 used as a B-cell marker. Mean±SD (from triplicate wells of representative sample).

(G) Kaplan-Meier analysis of mice described in (F). Yellow box represents duration of pI:pC injections (2 weeks). P-values and sample size (n) in panel key.

Significance determined by unpaired *t* test (C) or Log-Rank (Mantel-Cox) test (G). ns, not significant.

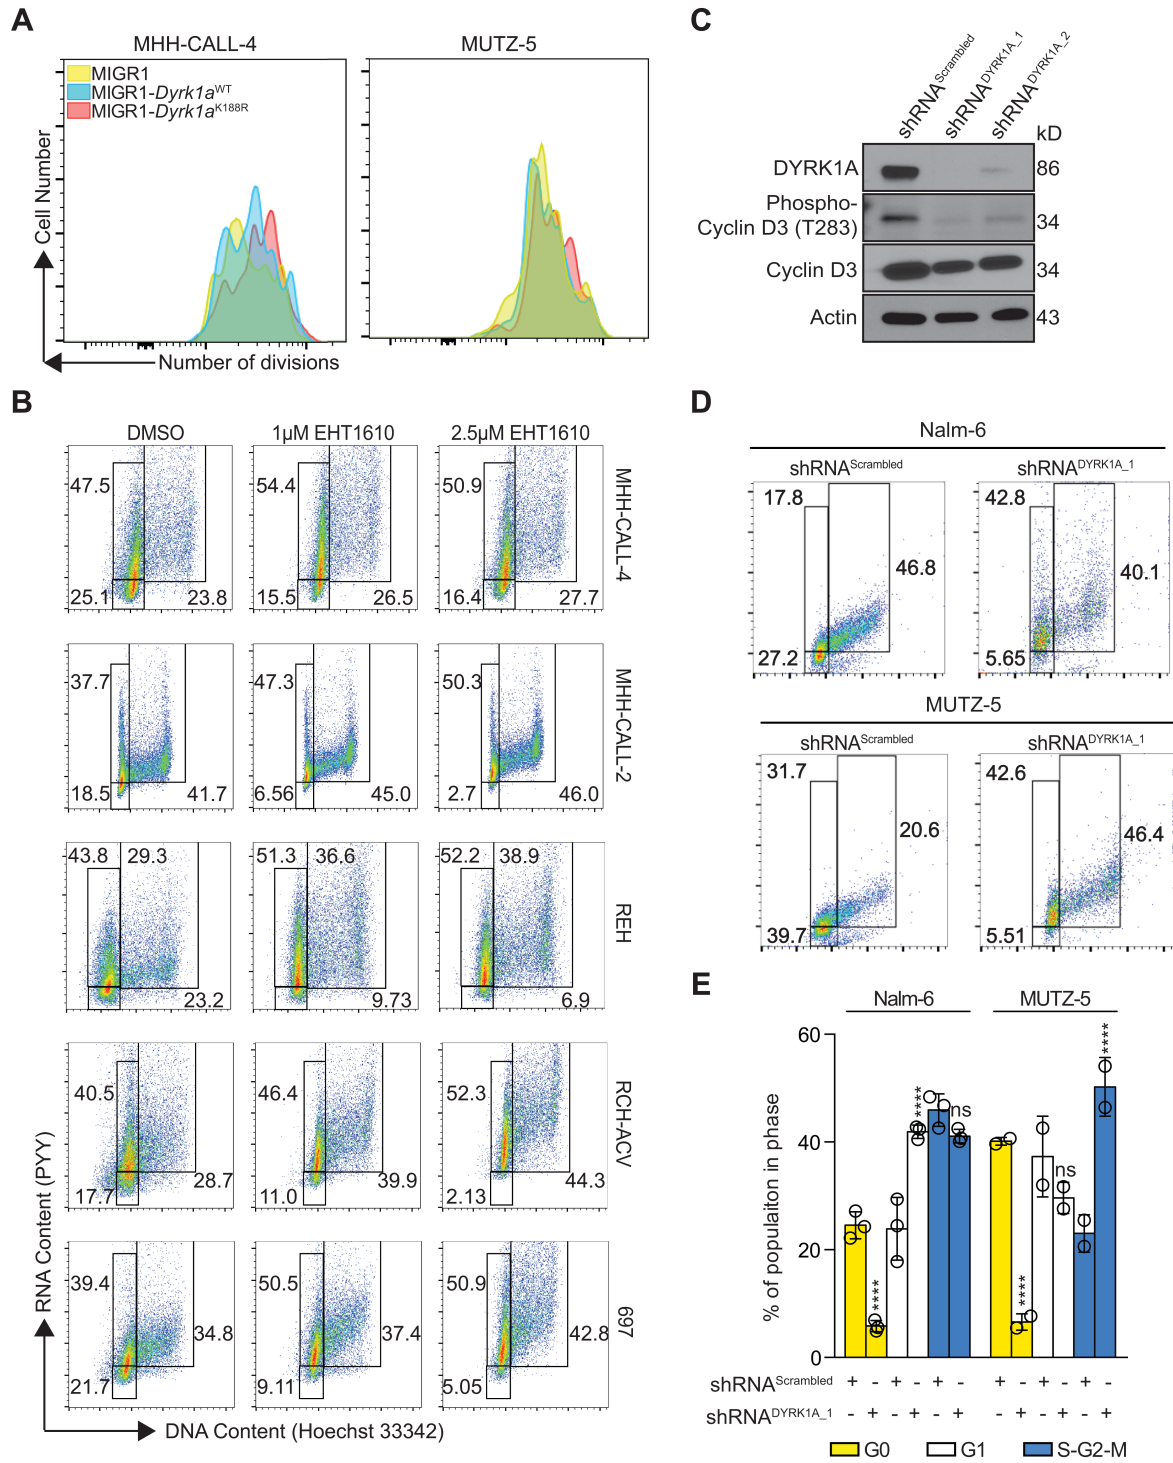

Supplementary Figure S2

**Supplementary Figure S2. DYRK1A inhibition impairs B-ALL cell growth.**

(A) Representative flow cytometry plot of CellTrace Violet dye dilution assay in GFP<sup>+</sup> cultured B-ALL cell lines transduced with MIGR1, MIGR1-*Dyrk1a*<sup>WT</sup>, or MIGR1-*Dyrk1a*<sup>K188R</sup>.

(B) Representative flow cytometry plots of DNA versus RNA content of cell lines after 48-hour treatment with EHT 1610. Numbers indicate percentages in each gate.

(C) Western blot showing DYRK1A, phospho-Cyclin D3 (T283), and total Cyclin D3 protein in MHH-CALL-4 cells transduced with shRNAs (scrambled, DYRK1A\_1, DYRK1A\_2).

(D) Representative flow cytometry plots of DNA versus RNA content of cell lines after transduction with shRNA<sup>Scrambled</sup> and shRNA<sup>DYRK1A\_1</sup>. Numbers indicate percentages in each gate.

(E) Cell cycle phase distribution based on gating in (D). Mean±SD. Nalm-6 (n=3 biological replicates), MUTZ-5 (n=2 biological replicates)

(A-C) n=3 biological replicates

Significance determined by ANOVA with post hoc Bonferroni correction (E, compared to scrambled shRNA expression within each cell line). ns, not significant; \*\*\*\*, p<0.0001.



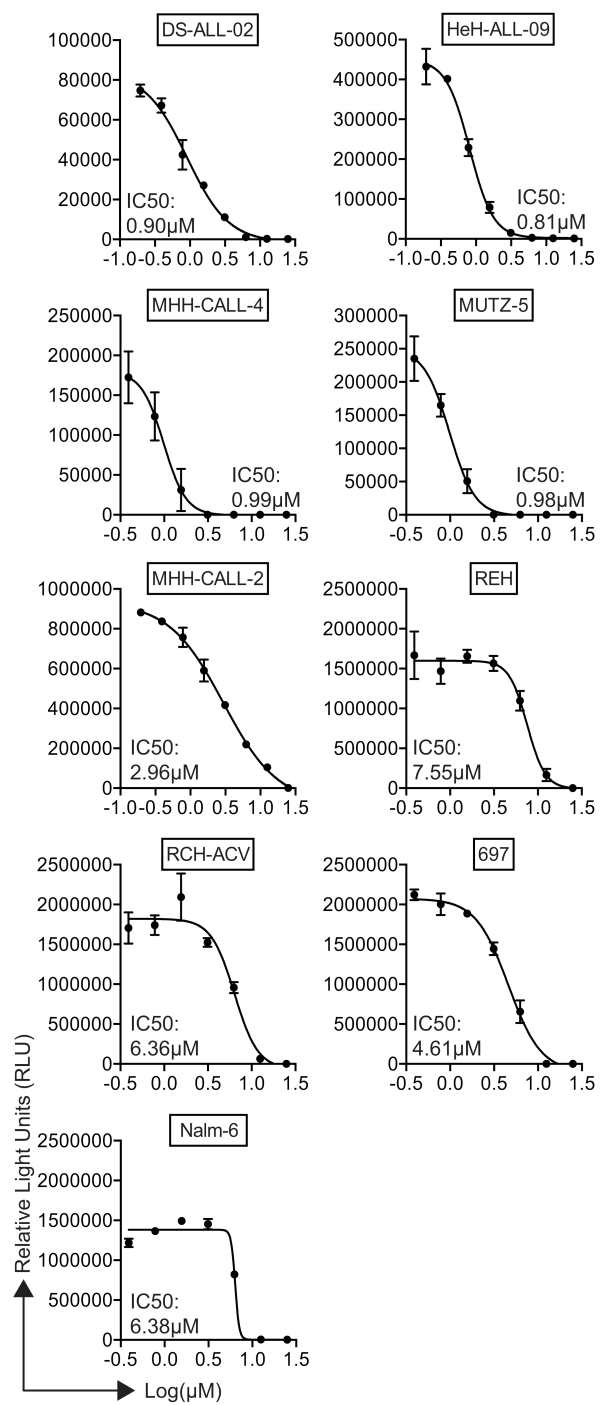

Supplementary Figure S3

**Supplementary Figure S3. B-ALL cells are sensitive to EHT 1610 in vitro.**

Cell number after treatment with various concentrations of EHT 1610 quantified by luminescence as relative light units (RLUs) from CellTiterGlo 2.0 assays. Curves fitted nonlinearly with variable slope (four parameters). IC50s shown in graph. n=3 biological replicates.

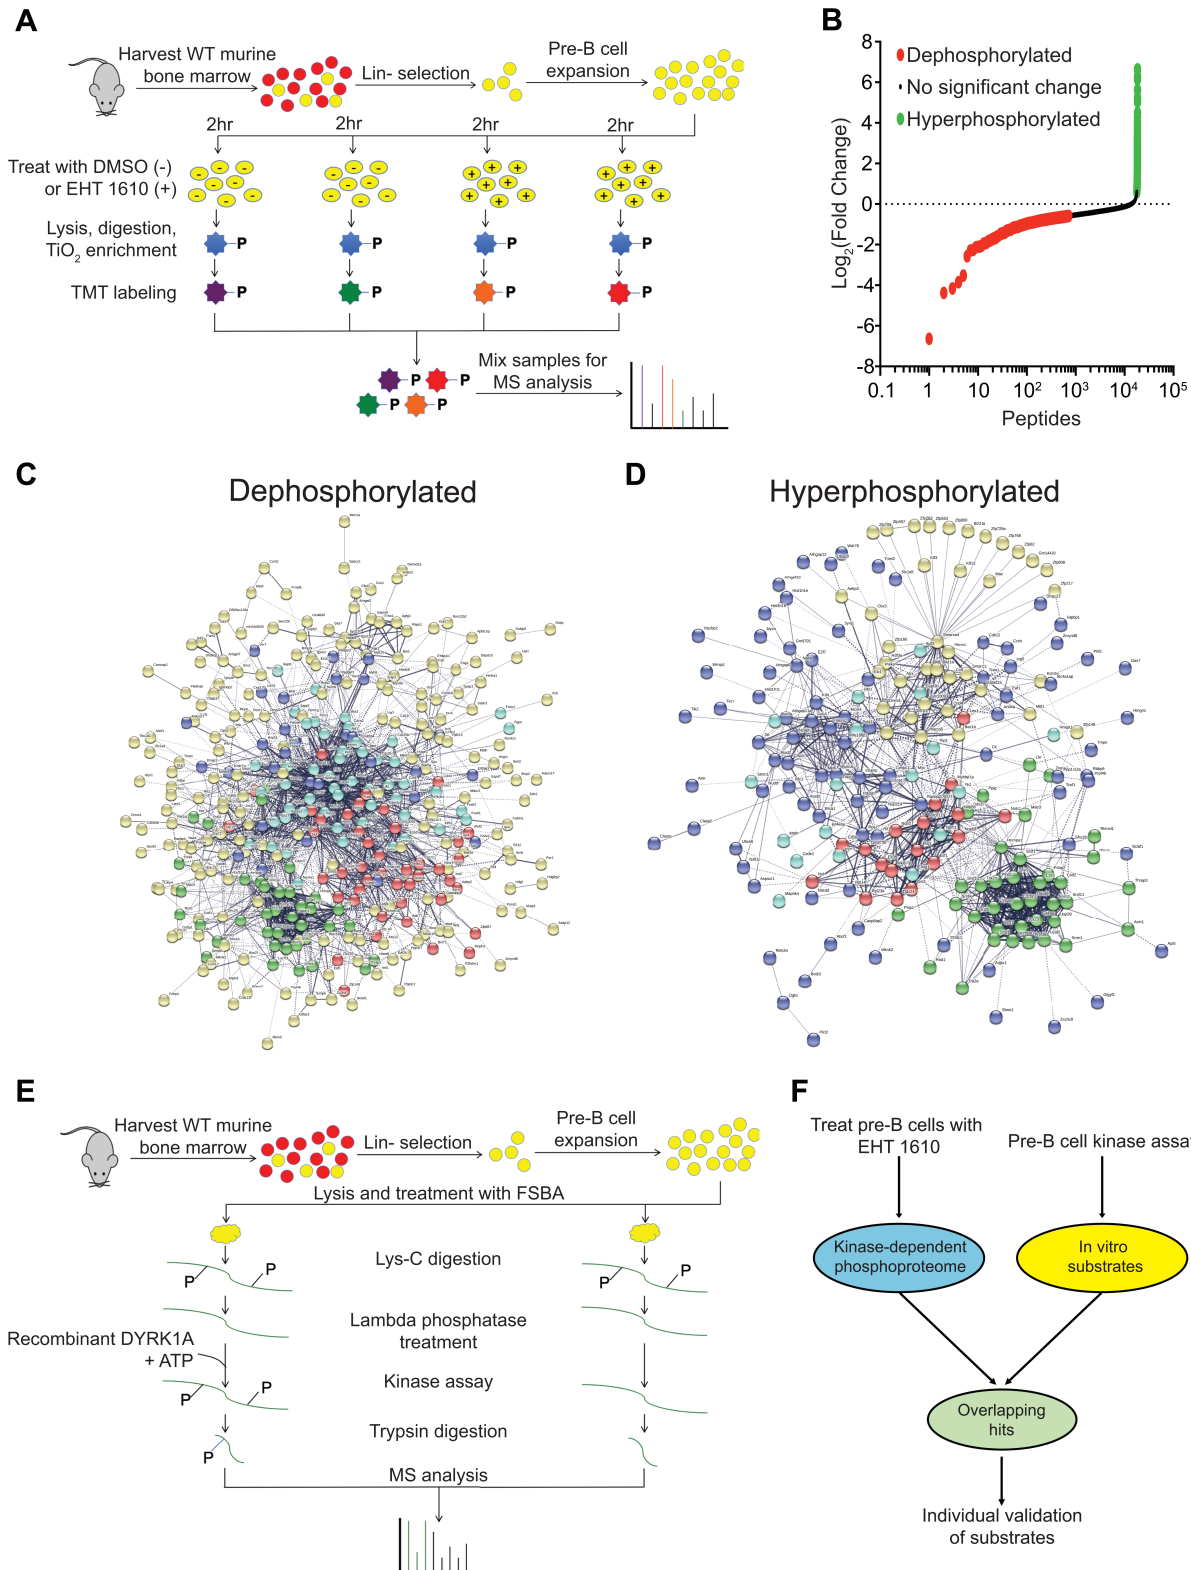

Supplementary Figure S4

**Supplementary Figure S4. Kinase assay-linked phosphoproteomics identifies candidate DYRK1A substrates in pre-B cells.**

(A) Schematic of global phosphoproteomics assay.

(B) Dot plot of differentially expressed phosphopeptides with hyperphosphorylated (green) and dephosphorylated (red) peptides using a 1.5-fold change cutoff for significance. Peptides were filtered using a false discovery rate (Q) <1% from 2 biological replicates.

(C, D) Redundant phosphopeptides are included in the plot. Interactome analysis was performed using the String database in dephosphorylated (C) and hyperphosphorylated (D) phosphopeptides sets. Disconnected nodes were hidden from the schematic. Colors of nodes represent clustering based on the density of interactions.

(E) Schematic of kinase assay phosphoproteomics. Experiment was performed with 2 biological replicates.

(F) Schematic of strategy used to identify potential DYRK1A substrates from experiments outlined in (A) and (E).

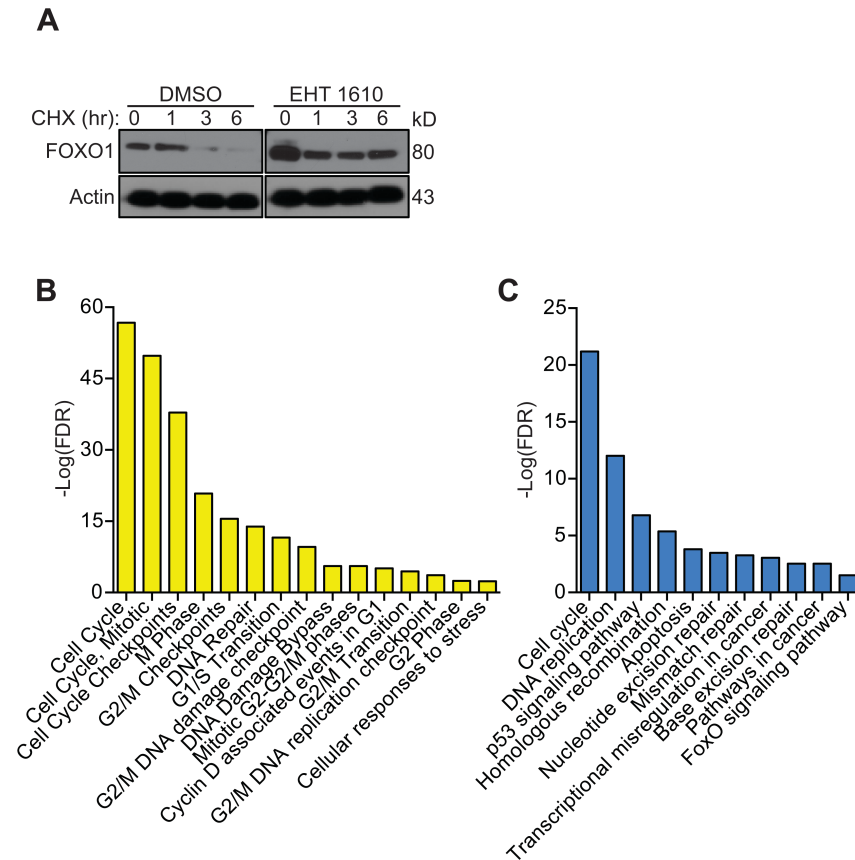

Supplementary Figure S5

**Supplementary Figure S5. DYRK1A regulates FOXO1 signaling in late cell cycle and DNA damage response.**

(A) Western blot showing total FOXO1 protein in pre-B cells treated with EHT 1610 in the presence of 25μg/mL cycloheximide (CHX). n=3 biological replicates.

(B, C) Upregulated transcripts identified by RNA-sequencing of FACS-sorted small pre-B cells from *Dyrk1a<sup>fl/fl</sup>* mice with or without *Mx1-Cre(3)* were analyzed in the String Database for Reactome pathway (C) and KEGG pathway (D) enrichment. FDR – False Discovery Rate.

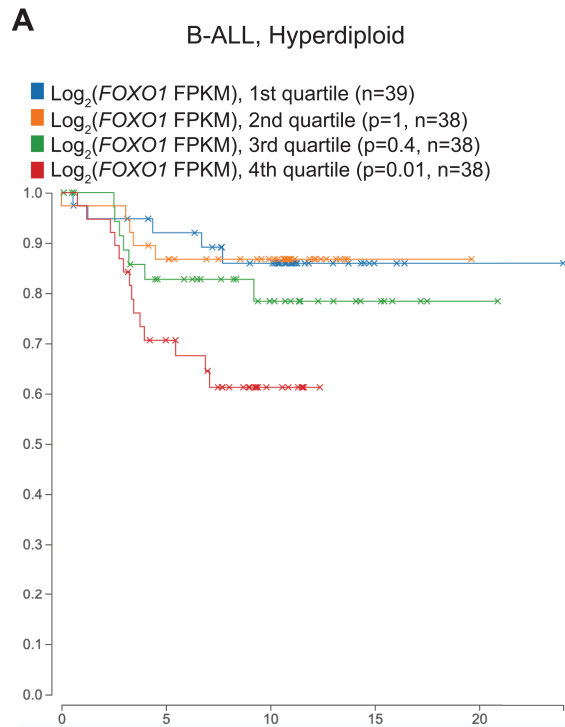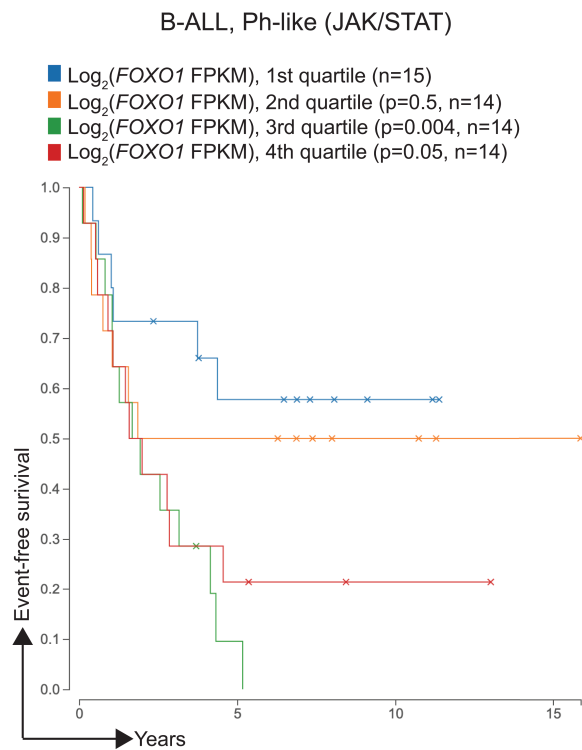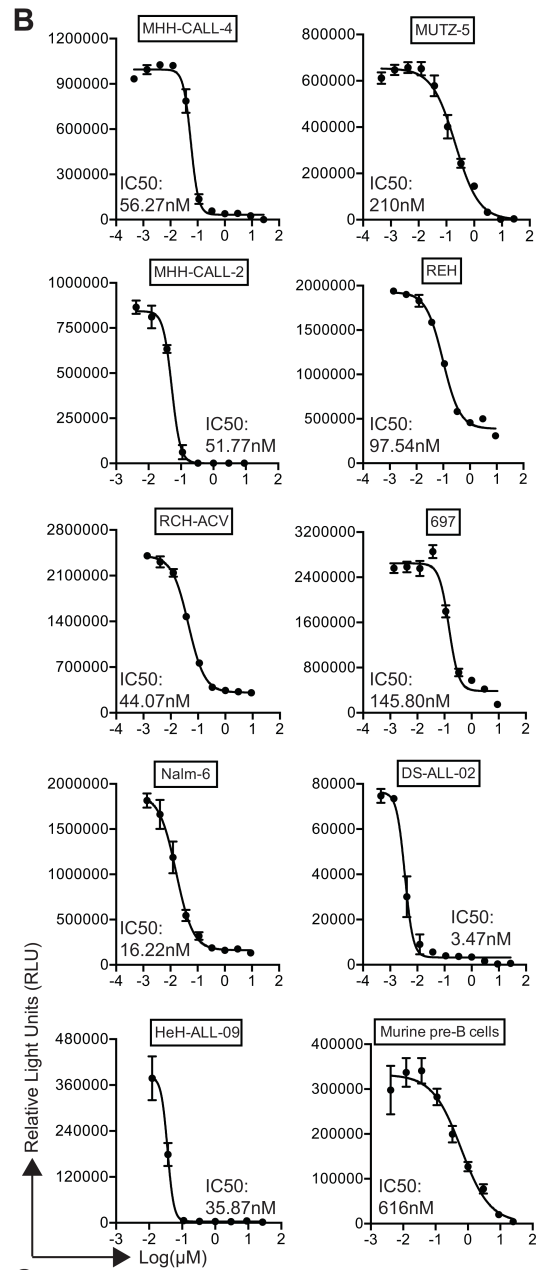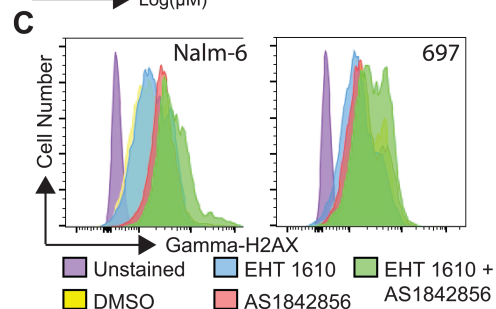

Supplementary Figure S6

**Supplementary Figure S6. FOXO1 is required for B-ALL DNA damage response and can be targeted with AS1842856.**

(A) Event-free survival analysis from St. Jude GenomePaint Pan-ALL cohort for patients with hyperdiploid (left) or Ph-like (JAK/STAT) (right) B-ALL. Data ordered by quartiles of *FOXO1* expression. P-values and sample size (n) in panel key.

(B) Cell number after treatment with various concentrations of AS1842856 quantified by luminescence as relative light units (RLUs) from CellTiterGlo 2.0 assays. Curves fitted nonlinearly with variable slope (four parameters). IC50s shown in graph.

(C) Representative flow cytometry plots of DNA damage using Gamma-H2AX staining in Nalm-6 and 697 cells treated with EHT 1610, AS1842856 (100nM, 500nM or 1000nM represented by scale bar), or both for 48 hours.

(B, C) n=3 biological replicates.

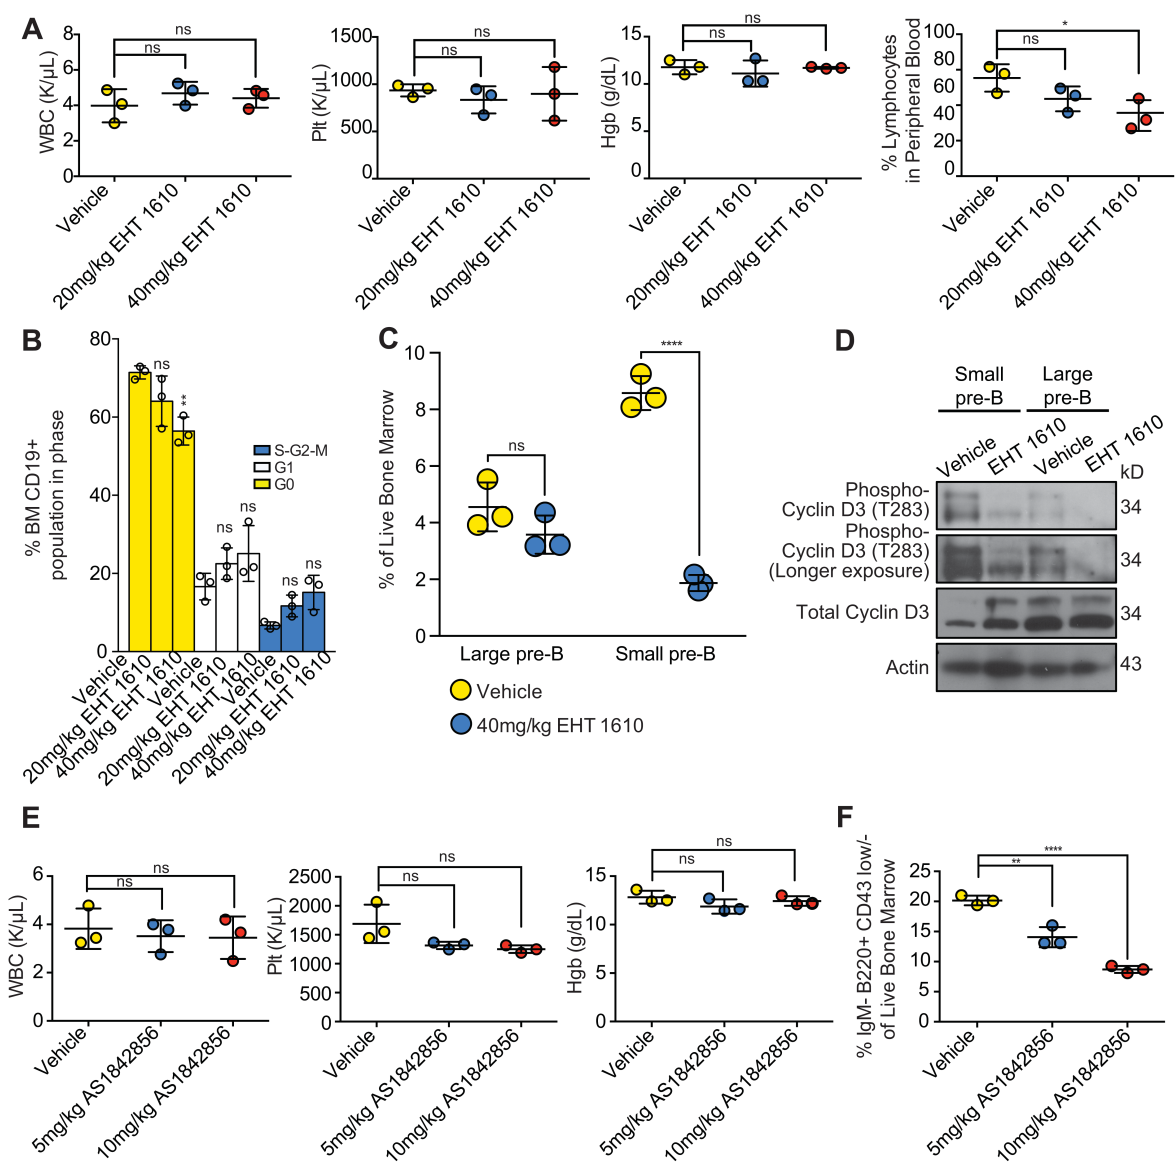

Supplementary Figure S7

**Supplementary Figure S7. EHT 1610 and AS1842856 are tolerated in vivo and exhibit on-target effects in C57BL/6 mice.**

(A) C57BL/6 mice were injected intraperitoneally with vehicle or EHT 1610 at 20mg/kg/day or 40mg/kg/day for 2 weeks. One day after completing treatment, peripheral blood was collected



for complete blood count (CBC) analysis of white blood cells (WBC), platelets (Plt), hemoglobin (Hgb), and peripheral blood lymphocyte percentage. Mean±SD.

(B) Cell cycle phase distribution of bone marrow CD19<sup>+</sup> cells from mice described in (A). Mean±SD.

(C-D) C57BL/6 mice were injected intraperitoneally with vehicle or EHT 1610 at 40mg/kg/day for 3 days. Large pre-B (IgM<sup>-</sup>, B220<sup>+</sup>, CD43<sup>low</sup>, FSC<sup>high</sup>) and small pre-B (IgM<sup>-</sup>, B220<sup>+</sup>, CD43<sup>-</sup>, FSC<sup>low</sup>) cells were isolated using FACS. (C) Comparison of large and small pre-B cell populations between treatment and vehicle groups. Mean±SD. (D) Low-input Western blot for total and phospho-Cyclin D3 (T283) from sorted cells in (C).

(E) C57BL/6 mice were injected intraperitoneally with vehicle or AS1842856 at 5mg/kg/day or 10mg/kg/day for 2 weeks. One day after completing treatment, peripheral blood was collected for CBC analysis of white blood cells (WBC), platelets (Plt), and hemoglobin (Hgb). Mean±SD.

(F) Bone marrow from mice described in (E) was isolated and analyzed for pre-B cells (IgM, B220<sup>+</sup>, CD43<sup>low/-</sup>) by flow cytometry. Mean±SD.

(A-F) n=3 mice per cohort

Significance determined by ANOVA with post hoc Bonferroni correction (A,B,E,F) or unpaired *t* test (C). For B, values compared to vehicle-treated mice within each cohort. ns, not significant;

\*, p<0.05; \*\*, p<0.01; \*\*\*\*, p<0.0001.

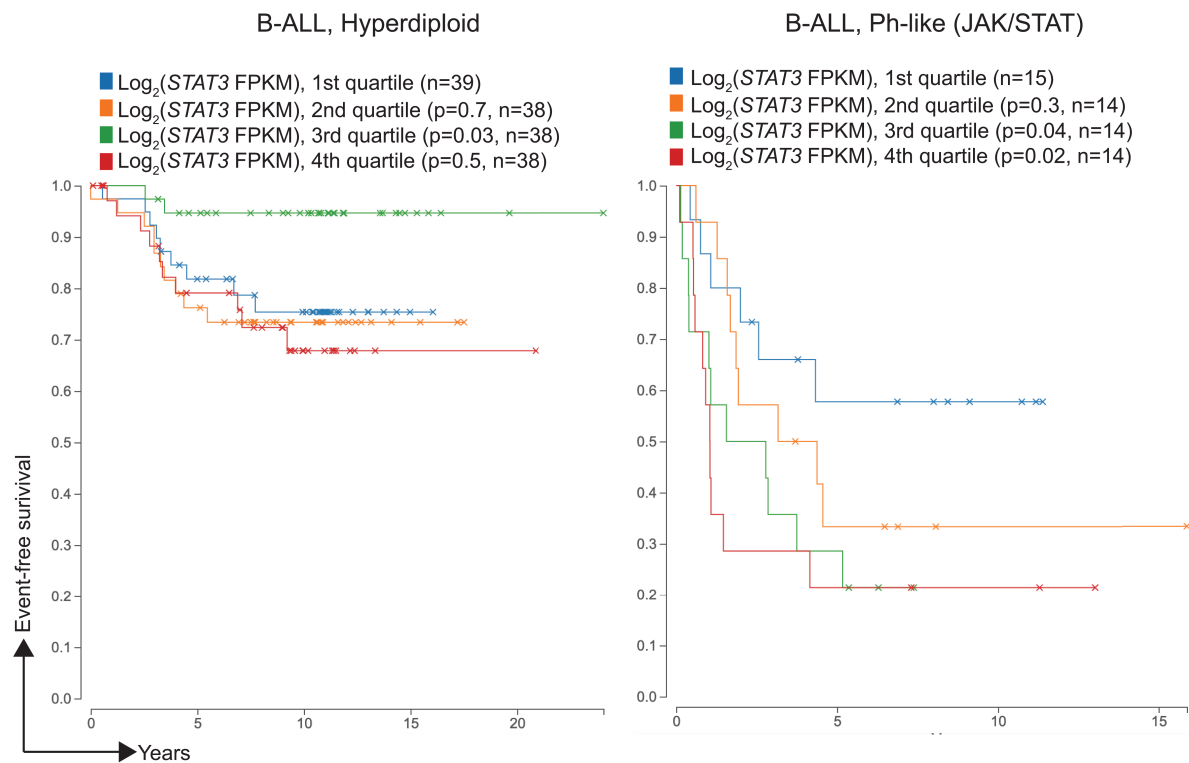

Supplementary Figure S8

**Supplementary Figure S8. *STAT3* expression correlates with worse survival outcomes in Ph-like ALL.**

(A) Event-free survival analysis from St. Jude GenomePaint Pan-ALL cohort for patients with hyperdiploid (left) or Ph-like (JAK/STAT) (right) B-ALL. Data ordered by quartiles of *STAT3* expression. P-values and sample size (n) in panel key.

## Supplementary Tables

| Cell Line/PDX Sample | Genetic Background                                               | EHT1610 IC50 (μM) | AS1842856 IC50 (nM) |
|----------------------|------------------------------------------------------------------|-------------------|---------------------|
| MHH-CALL-4           | Ph-like ( <i>CRLF2</i> , <i>JAK2</i> )                           | 0.99              | 56.27               |
| MUTZ-5               | Ph-like ( <i>CRLF2</i> , <i>JAK2</i> )                           | 0.98              | 210.00              |
| MHH-CALL-2           | Hyperdiploid                                                     | 2.96              | 51.77               |
| REH                  | <i>ETV6-RUNX1</i>                                                | 7.55              | 97.54               |
| RCH-ACV              | <i>E2A-PBX</i>                                                   | 6.36              | 44.07               |
| Nalm-6               | <i>ETV6-PDGFRB</i>                                               | 6.38              | 16.22               |
| 697                  | <i>E2A-PBX</i>                                                   | 4.61              | 145.80              |
| HeH-ALL-09           | Hyperdiploid ( <i>KRAS</i> )                                     | 0.81              | 35.87               |
| DS-ALL-02            | Down syndrome-ALL ( <i>CRLF2</i> , <i>JAK2</i> , <i>CDKN2A</i> ) | 0.90              | 3.47                |
| WT Murine Pre-B      | C57BL/6J                                                         |                   | 616.00              |

**Supplementary Table S1. EHT 1610 and AS1842856 IC50 values in B-ALL cell lines and human PDX-passaged B-ALL samples**

|               | Patient ID | PDX ID | Risk | EHT1610      |              | Harmine      |              | INDY         |              |
|---------------|------------|--------|------|--------------|--------------|--------------|--------------|--------------|--------------|
|               |            |        |      | IC50 Log[nM] | IC50 $\mu$ M | IC50 Log[nM] | IC50 $\mu$ M | IC50 Log[nM] | IC50 $\mu$ M |
| <b>B-ALL</b>  | ZH61a      | m125   | VHR  | >4.3         | >20          | >4.3         | >20          | >4.3         | >20          |
|               | F18        | m1009  | VHR  | 3.397        | 2.495        | 3.584        | 3.837        | >4.3         | >20          |
|               | SN10       | m1086  | VHR  | 2.911        | 0.815        | 3.631        | 4.276        | 4.174        | 14.928       |
|               | L2         | m1339  | SR   | >4.3         | >20          | 4.201        | 15.885       | >4.3         | >20          |
|               | E55        | m1760  | SR   | >4.3         | >20          | 4.259        | 18.155       | >4.3         | >20          |
| <b>T-ALL</b>  | N20        | m1814  | MR   | 4.2          | 15.849       | >4.3         | >20          | >4.3         | >20          |
|               | F110       | m2000  | HR   | >4.3         | >20          | >4.3         | >20          | >4.3         | >20          |
|               | MU46       | m3021  | MR   | >4.3         | >20          | 4.073        | 11.830       | 4.228        | 16.904       |
|               | GI33       | m1797  | MR   | >4.3         | >20          | 4.289        | 19.454       | >4.3         | >20          |
|               | S24        | m3013  | VHR  | 2.8          | 0.631        | 3.1          | 1.259        | >4.3         | >20          |
| <b>DS-ALL</b> | ER43       | m1070  | VHR  | 3.846        | 7.015        | 3.987        | 9.705        | 4.3          | 20           |
|               | M62        | m1686  | VHR  | 3.063        | 1.156        | 3.754        | 5.675        | 3.884        | 7.656        |
|               | DS-FF      | m730   | MR   | 3.094        | 1.242        | 3.671        | 4.688        | >4.3         | >20          |
|               | DS-MF      | m703   | MR   | 3.877        | 7.534        | 4.118        | 13.122       | >4.3         | >20          |
|               | 99-116     | m484   | MR   | 3.303        | 2.009        | 4.274        | 18.793       | >4.3         | >20          |
|               | AC23       | m39    | MR   | 3.938        | 8.670        | 3.862        | 7.278        | >4.3         | >20          |
|               | DS-GS      | m723   | MR   | >4.3         | >20          | >4.3         | >20          | >4.3         | >20          |
|               | B65        | m3285  | MR   | >4.3         | >20          | >4.3         | >20          | 4.296        | 19.770       |

**Supplementary Table S2. EHT 1610, harmine, and INDY IC50 values in ALL patient samples**

|                 | <b>Multiples<br/>of IC50</b> | <b>EHT1610<br/>(<math>\mu</math>M)</b> | <b>Cytarabine<br/>(<math>\mu</math>M)</b> | <b>Dexamethasone<br/>(<math>\mu</math>M)</b> | <b>Methotrexate<br/>(<math>\mu</math>M)</b> | <b>AS1842856<br/>(nM)</b> |
|-----------------|------------------------------|----------------------------------------|-------------------------------------------|----------------------------------------------|---------------------------------------------|---------------------------|
| MHH-<br>CALL-4* | 0.25                         | 0.25                                   |                                           |                                              |                                             | 14.00                     |
|                 | 0.5                          | 0.49                                   |                                           |                                              |                                             | 28.00                     |
|                 | 1                            | 0.98                                   |                                           |                                              |                                             | 56.00                     |
|                 | 2                            | 1.96                                   |                                           |                                              |                                             | 112.00                    |
|                 | 4                            | 3.92                                   |                                           |                                              |                                             | 224.00                    |
| MUTZ-5*         | 0.25                         | 0.25                                   |                                           |                                              |                                             | 52.50                     |
|                 | 0.5                          | 0.49                                   |                                           |                                              |                                             | 105.00                    |
|                 | 1                            | 0.98                                   |                                           |                                              |                                             | 210.00                    |
|                 | 2                            | 1.96                                   |                                           |                                              |                                             | 420.00                    |
|                 | 4                            | 3.92                                   |                                           |                                              |                                             | 840.00                    |
| MHH-<br>CALL-2* | 0.25                         | 0.74                                   |                                           |                                              |                                             | 12.94                     |
|                 | 0.5                          | 1.48                                   |                                           |                                              |                                             | 25.89                     |
|                 | 1                            | 2.96                                   |                                           |                                              |                                             | 51.77                     |
|                 | 2                            | 5.92                                   |                                           |                                              |                                             | 103.54                    |
|                 | 4                            | 11.84                                  |                                           |                                              |                                             | 207.08                    |
| REH**           | 0.25                         | 1.89                                   | 0.0071                                    | 0.5625                                       |                                             | 24.38                     |
|                 | 0.5                          | 3.77                                   | 0.0141                                    | 1.1250                                       |                                             | 48.75                     |
|                 | 1                            | 7.55                                   | 0.0283                                    | 2.2500                                       |                                             | 97.50                     |
|                 | 2                            | 15.10                                  | 0.0566                                    | 4.5000                                       |                                             | 195.00                    |
|                 | 4                            | 30.20                                  | 0.1131                                    | 9.0000                                       |                                             | 390.00                    |
| RCH-ACV         | 0.25                         | 1.59                                   | 0.0028                                    | 0.0564                                       | 0.0030                                      | 11.03                     |
|                 | 0.5                          | 3.18                                   | 0.0056                                    | 0.1128                                       | 0.0059                                      | 22.05                     |
|                 | 1                            | 6.36                                   | 0.0112                                    | 0.2255                                       | 0.0118                                      | 44.10                     |
|                 | 2                            | 12.72                                  | 0.0224                                    | 0.4510                                       | 0.0236                                      | 88.20                     |
|                 | 4                            | 25.44                                  | 0.0448                                    | 0.9020                                       | 0.0472                                      | 176.40                    |
| 697             | 0.25                         | 1.15                                   | 0.0007                                    | 0.0464                                       | 0.0028                                      | 36.45                     |
|                 | 0.5                          | 2.30                                   | 0.0014                                    | 0.0927                                       | 0.0056                                      | 72.90                     |
|                 | 1                            | 4.61                                   | 0.0029                                    | 0.1854                                       | 0.0112                                      | 145.80                    |
|                 | 2                            | 9.21                                   | 0.0057                                    | 0.3708                                       | 0.0224                                      | 291.60                    |
|                 | 4                            | 18.42                                  | 0.0115                                    | 0.7416                                       | 0.0448                                      | 583.20                    |
| Nalm-6          | 0.25                         | 1.58                                   | 0.0068                                    | 0.0592                                       | 0.0051                                      | 4.05                      |
|                 | 0.5                          | 3.17                                   | 0.0135                                    | 0.1183                                       | 0.0103                                      | 8.10                      |
|                 | 1                            | 6.34                                   | 0.0270                                    | 0.2366                                       | 0.0206                                      | 16.20                     |
|                 | 2                            | 12.67                                  | 0.0540                                    | 0.4732                                       | 0.0411                                      | 32.40                     |
|                 | 4                            | 25.35                                  | 0.1080                                    | 0.9464                                       | 0.0823                                      | 64.80                     |

\*MHH-CALL4, MHH-CALL-2, and MUTZ-5 have sufficient sensitivity towards EHT1610 so

cytotoxic chemotherapy synergy assays were not performed with these lines

\*\*REH displayed minimal sensitivity towards Dexamethasone up to 9 $\mu$ M, so multiples up to

9 $\mu$ M were used. REH IC50 to Methotrexate was subnanomolar so this was excluded

**Supplementary Table S3. Multiples of IC50 across ALL cell lines for EHT 1610, AS1842856, methotrexate, dexamethasone, and cytarabine**

|                  |            |          |          |          |            |          |         |          |
|------------------|------------|----------|----------|----------|------------|----------|---------|----------|
| Cell Line:       | MHH-CALL-4 |          | MUTZ-5   |          | MHH-CALL-2 |          |         |          |
| Combination:     | EHT+AS     |          | EHT+AS   |          | EHT+AS     |          |         |          |
| Multiple of IC50 | Fa         | CI Value | Fa       | CI Value | Fa         | CI Value |         |          |
| 0.25             | 0.391      | 0.0842   | 0.623    | 0.04838  | 0.27142    | 0.30698  |         |          |
| 0.5              | 0.422      | 0.1254   | 0.71     | 0.07642  | 0.594777   | 0.30482  |         |          |
| 1                | 0.523      | 0.09882  | 0.834    | 0.09931  | 0.782579   | 0.38568  |         |          |
| 2                | 0.819      | 0.08216  | 0.883    | 0.15565  | 0.938792   | 0.36833  |         |          |
| 4                | 0.93362    | 0.00188  | 0.971    | 0.12759  | 0.974884   | 0.45872  |         |          |
| Cell Line:       | REH        |          |          |          |            |          |         |          |
| Combination:     | EHT+Dex    |          | EHT+AraC |          | EHT+AS     |          |         |          |
| Multiple of IC50 | Fa         | CI Value | Fa       | CI Value | Fa         | CI Value |         |          |
| 0.25             | 0.256      | 0.47982  | 0.232    | 0.551    | 0.31       | 0.4874   |         |          |
| 0.5              | 0.34       | 0.61691  | 0.315    | 0.69824  | 0.314      | 0.96232  |         |          |
| 1                | 0.437      | 0.79029  | 0.386    | 0.99442  | 0.675      | 0.67669  |         |          |
| 2                | 0.557      | 0.93604  | 0.569    | 0.888442 | 0.9        | 0.49126  |         |          |
| 4                | 0.691      | 1.00172  | 0.737    | 0.78482  | 0.981      | 0.29382  |         |          |
| Cell Line:       | RCH-ACV    |          |          |          |            |          |         |          |
| Combination:     | EHT+Dex    |          | EHT+AraC |          | EHT+MTX    |          | EHT+AS  |          |
| Multiple of IC50 | Fa         | CI Value | Fa       | CI Value | Fa         | CI Value | Fa      | CI Value |
| 0.25             | 0.775      | 0.32096  | 0.437    | 0.50675  | 0.53095    | 0.37826  | 0.3521  | 0.60819  |
| 0.5              | 0.864      | 0.53189  | 0.549    | 0.88286  | 0.57396    | 0.67589  | 0.42933 | 0.98548  |
| 1                | 0.981      | 0.55943  | 0.73     | 1.38239  | 0.71307    | 0.90939  | 0.61633 | 1.20629  |
| 2                | 0.99989    | 0.22917  | 0.976    | 1.20396  | 0.89618    | 0.81232  | 0.88465 | 0.87718  |
| 4                | 0.99993    | 0.39901  | 0.99992  | 0.4157   | 0.99886    | 0.08166  | 0.99962 | 0.04011  |
| Cell Line:       | Nalm-6     |          |          |          |            |          |         |          |
| Combination:     | EHT+Dex    |          | EHT+AraC |          | EHT+MTX    |          | EHT+AS  |          |
| Multiple of IC50 | Fa         | CI Value | Fa       | CI Value | Fa         | CI Value | Fa      | CI Value |
| 0.25             | 0.931      | 0.33054  | 0.784    | 0.46473  | 0.598      | 0.31439  | 0.25219 | 0.74907  |
| 0.5              | 0.992      | 0.37188  | 0.981    | 0.46693  | 0.688      | 0.49929  | 0.41839 | 0.96146  |
| 1                | 0.99965    | 0.32974  | 0.998    | 0.5186   | 0.81       | 0.67872  | 0.77602 | 0.76606  |
| 2                | 0.99958    | 0.69141  | 0.99979  | 0.57791  | 0.982      | 0.30507  | 0.99248 | 0.18188  |
| 4                | 0.99993    | 0.868889 | 0.99992  | 0.89992  | 0.99914    | 0.10179  | 0.99892 | 0.11635  |
| Cell Line:       | 697        |          |          |          |            |          |         |          |
| Combination:     | EHT+Dex    |          | EHT+AraC |          | EHT+MTX    |          | EHT+AS  |          |
| Multiple of IC50 | Fa         | CI Value | Fa       | CI Value | Fa         | CI Value | Fa      | CI Value |
| 0.25             | 0.552      | 0.47607  | 0.366    | 0.61193  | 0.347      | 0.40339  | 0.696   | 0.14282  |
| 0.5              | 0.673      | 0.80297  | 0.561    | 0.93999  | 0.402      | 1.3648   | 0.752   | 0.23356  |
| 1                | 0.908      | 0.95412  | 0.657    | 1.64354  | 0.354      | 0.78929  | 0.832   | 0.32905  |
| 2                | 0.99973    | 0.2665   | 0.996    | 0.65289  | 0.72       | 1.0494   | 0.883   | 0.48733  |
| 4                | 0.9999     | 0.38322  | 0.99994  | 0.32333  | 0.977      | 0.2846   | 0.914   | 0.76364  |

**Supplementary Table S4. Combination indices for EHT 1610 combined with cytotoxic chemotherapy or AS1842856**

| <b>Input</b> | <b>MGI<br/>Gene/Marker ID</b> | <b>Symbol</b> | <b>Name</b>                                                      |
|--------------|-------------------------------|---------------|------------------------------------------------------------------|
| Akap12       | MGI:1932576                   | Akap12        | A kinase (PRKA) anchor protein (gravin) 12                       |
| Aebp2        | MGI:1338038                   | Aebp2         | AE binding protein 2                                             |
| Mki67        | MGI:106035                    | Mki67         | antigen identified by monoclonal antibody Ki 67                  |
| Aak1         | MGI:1098687                   | Aak1          | AP2 associated kinase 1                                          |
| Acin1        | MGI:1891824                   | Acin1         | apoptotic chromatin condensation inducer 1                       |
| Atxn2        | MGI:1277223                   | Atxn2         | ataxin 2                                                         |
| Atrx         | MGI:103067                    | Atrx          | ATRX, chromatin remodeler                                        |
| Bin1         | MGI:108092                    | Bin1          | bridging integrator 1                                            |
| C2cd5        | MGI:1921991                   | C2cd5         | C2 calcium-dependent domain containing 5                         |
| Ccnd3        | MGI:88315                     | Ccnd3         | Cyclin D3                                                        |
| Cd44         | MGI:88338                     | Cd44          | CD44 antigen                                                     |
| Coro1a       | MGI:1345961                   | Coro1a        | coronin, actin binding protein 1A                                |
| Cux1         | MGI:88568                     | Cux1          | cut-like homeobox 1                                              |
| Ccnk         | MGI:1276106                   | Ccnk          | cyclin K                                                         |
| Dand5        | MGI:1344365                   | Dand5         | DAN domain family member 5, BMP antagonist                       |
| Dnajc2       | MGI:99470                     | Dnajc2        | DnaJ heat shock protein family (Hsp40)<br>member C2              |
| Ezh2         | MGI:107940                    | Ezh2          | enhancer of zeste 2 polycomb repressive<br>complex 2 subunit     |
| Eps15        | MGI:104583                    | Eps15         | epidermal growth factor receptor pathway<br>substrate 15         |
| Etv6         | MGI:109336                    | Etv6          | ets variant 6                                                    |
| Eif4g1       | MGI:2384784                   | Eif4g1        | eukaryotic translation initiation factor 4, gamma<br>1           |
| Eif4b        | MGI:95304                     | Eif4b         | eukaryotic translation initiation factor 4B                      |
| Eif4ebp1     | MGI:103267                    | Eif4ebp1      | eukaryotic translation initiation factor 4E<br>binding protein 1 |
| Foxk1        | MGI:1347488                   | Foxk1         | forkhead box K1                                                  |
| Foxo1        | MGI:1890077                   | Foxo1         | forkhead box O1                                                  |
| Gpkow        | MGI:1859610                   | Gpkow         | G patch domain and KOW motifs                                    |
| Gatad2a      | MGI:2384585                   | Gatad2a       | GATA zinc finger domain containing 2A                            |
| Gtf2f1       | MGI:1923848                   | Gtf2f1        | general transcription factor IIF, polypeptide 1                  |
| Git1         | MGI:1927140                   | Git1          | GIT ArfGAP 1                                                     |
| Glcci1       | MGI:2179717                   | Glcci1        | glucocorticoid induced transcript 1                              |
| Hsp90ab1     | MGI:96247                     | Hsp90ab<br>1  | heat shock protein 90 alpha (cytosolic), class B<br>member 1     |
| Huwe1        | MGI:1926884                   | Huwe1         | HECT, UBA and WWE domain containing 1                            |
| Hnrnpk       | MGI:99894                     | Hnrnpk        | heterogeneous nuclear ribonucleoprotein K                        |
| Htatsf1      | MGI:1919709                   | Htatsf1       | HIV TAT specific factor 1                                        |
| Hcfc1        | MGI:105942                    | Hcfc1         | host cell factor C1                                              |
| Ibtk         | MGI:1918677                   | Ibtk          | inhibitor of Bruton agammaglobulinemia<br>tyrosine kinase        |
| Ifngr1       | MGI:107655                    | Ifngr1        | interferon gamma receptor 1                                      |



|         |             |         |                                                                             |
|---------|-------------|---------|-----------------------------------------------------------------------------|
| Iws1    | MGI:1920723 | Iws1    | IWS1, SUPT6 interacting protein                                             |
| jmjd1c  | MGI:1918614 | Jmjd1c  | jumonji domain containing 1C                                                |
| Kansl1  | MGI:1923969 | Kansl1  | KAT8 regulatory NSL complex subunit 1                                       |
| Larp1   | MGI:1890165 | Larp1   | La ribonucleoprotein domain family, member 1                                |
| Larp4   | MGI:2443114 | Larp4   | La ribonucleoprotein domain family, member 4                                |
| Leo1    | MGI:2685031 | Leo1    | Leo1, Paf1/RNA polymerase II complex component                              |
| Lrrfip1 | MGI:1342770 | Lrrfip1 | leucine rich repeat (in FLII) interacting protein 1                         |
| Lsp1    | MGI:96832   | Lsp1    | lymphocyte specific 1                                                       |
| Kdm6a   | MGI:1095419 | Kdm6a   | lysine (K)-specific demethylase 6A                                          |
| Med15   | MGI:2137379 | Med15   | mediator complex subunit 15                                                 |
| Mettl3  | MGI:1927165 | Mettl3  | methyltransferase like 3                                                    |
| Mef2d   | MGI:99533   | Mef2d   | myocyte enhancer factor 2D                                                  |
| Myo9b   | MGI:106624  | Myo9b   | myosin IXb                                                                  |
| Nedd4l  | MGI:1933754 | Nedd4l  | neural precursor cell expressed, developmentally down-regulated gene 4-like |
| Nipbl   | MGI:1913976 | Nipbl   | NIPBL cohesin loading factor                                                |
| Nfrkb   | MGI:2442410 | Nfrkb   | nuclear factor related to kappa B binding protein                           |
| Numa1   | MGI:2443665 | Numa1   | nuclear mitotic apparatus protein 1                                         |
| Ncor1   | MGI:1349717 | Ncor1   | nuclear receptor co-repressor 1                                             |
| Ncor2   | MGI:1337080 | Ncor2   | nuclear receptor co-repressor 2                                             |
| Npm1    | MGI:106184  | Npm1    | nucleophosmin 1                                                             |
| Pds5a   | MGI:1918771 | Pds5a   | PDS5 cohesin associated factor A                                            |
| Pnn     | MGI:1100514 | Pnn     | pinin                                                                       |
| Pkp4    | MGI:109281  | Pkp4    | plakophilin 4                                                               |
| Pnlsr   | MGI:1913875 | Pnlsr   | PNN interacting serine/arginine-rich                                        |
| Ptbp3   | MGI:1923334 | Ptbp3   | polypyrimidine tract binding protein 3                                      |
| Prrc2c  | MGI:1913754 | Prrc2c  | proline-rich coiled-coil 2C                                                 |
| Prkd3   | MGI:1922542 | Prkd3   | protein kinase D3                                                           |
| Pkn1    | MGI:108022  | Pkn1    | protein kinase N1                                                           |
| Ppp1r7  | MGI:1913635 | Ppp1r7  | protein phosphatase 1, regulatory subunit 7                                 |
| Ppp1r9b | MGI:2387581 | Ppp1r9b | protein phosphatase 1, regulatory subunit 9B                                |
| Ptpnc   | MGI:97810   | Ptpnc   | protein tyrosine phosphatase, receptor type, C                              |
| Pum1    | MGI:1931749 | Pum1    | pumilio RNA-binding family member 1                                         |
| Reps1   | MGI:1196373 | Reps1   | RalBP1 associated Eps domain containing protein                             |
| Ranbp3  | MGI:1919060 | Ranbp3  | RAN binding protein 3                                                       |
| Rasgrp2 | MGI:1333849 | Rasgrp2 | RAS, guanyl releasing protein 2                                             |
| Rcsd1   | MGI:2676394 | Rcsd1   | RCSD domain containing 1                                                    |
| Rgcc    | MGI:1913464 | Rgcc    | regulator of cell cycle                                                     |
| Rsf1    | MGI:2682305 | Rsf1    | remodeling and spacing factor 1                                             |
| Rfc1    | MGI:97891   | Rfc1    | replication factor C (activator 1) 1                                        |
| Arhgef7 | MGI:1860493 | Arhgef7 | Rho guanine nucleotide exchange factor (GEF7)                               |
| Arhgef2 | MGI:103264  | Arhgef2 | rho/rac guanine nucleotide exchange factor (GEF) 2                          |

|         |             |         |                                                                                 |
|---------|-------------|---------|---------------------------------------------------------------------------------|
| Rrm2    | MGI:98181   | Rrm2    | ribonucleotide reductase M2                                                     |
| Rpl6    | MGI:108057  | Rpl6    | ribosomal protein L6                                                            |
| Ric8a   | MGI:2141866 | Ric8a   | RIC8 guanine nucleotide exchange factor A                                       |
| Rnf213  | MGI:1289196 | Rnf213  | ring finger protein 213                                                         |
| Rbm14   | MGI:1929092 | Rbm14   | RNA binding motif protein 14                                                    |
| Rbm27   | MGI:2147194 | Rbm27   | RNA binding motif protein 27                                                    |
| Rbm5    | MGI:1933204 | Rbm5    | RNA binding motif protein 5                                                     |
| Sltm    | MGI:1913910 | Sltm    | SAFB-like, transcription modulator                                              |
| Samsn1  | MGI:1914992 | Samsn1  | SAM domain, SH3 domain and nuclear localization signals, 1                      |
| Srrm1   | MGI:1858303 | Srrm1   | serine/arginine repetitive matrix 1                                             |
| Srrm2   | MGI:1923206 | Srrm2   | serine/arginine repetitive matrix 2                                             |
| Srsf1   | MGI:98283   | Srsf1   | serine/arginine-rich splicing factor 1                                          |
| Srsf2   | MGI:98284   | Srsf2   | serine/arginine-rich splicing factor 2                                          |
| Set     | MGI:1860267 | Set     | SET nuclear oncogene                                                            |
| Stat3   | MGI:103038  | Stat3   | signal transducer and activator of transcription 3                              |
| Slc19a1 | MGI:103182  | Slc19a1 | solute carrier family 19 (folate transporter), member 1                         |
| Slc25a1 | MGI:1345283 | Slc25a1 | solute carrier family 25 (mitochondrial carrier, citrate transporter), member 1 |
| Sf3b1   | MGI:1932339 | Sf3b1   | splicing factor 3b, subunit 1                                                   |
| Sf3b2   | MGI:2441856 | Sf3b2   | splicing factor 3b, subunit 2                                                   |
| Sympk   | MGI:1915438 | Sympk   | symplekin                                                                       |
| Synrg   | MGI:1354742 | Synrg   | synergisin, gamma                                                               |
| Taf3    | MGI:2388097 | Taf3    | TATA-box binding protein associated factor 3                                    |
| Tmpo    | MGI:106920  | Tmpo    | thymopoietin                                                                    |
| Thrap3  | MGI:2442637 | Thrap3  | thyroid hormone receptor associated protein 3                                   |
| Top2a   | MGI:98790   | Top2a   | topoisomerase (DNA) II alpha                                                    |
| Top2b   | MGI:98791   | Top2b   | topoisomerase (DNA) II beta                                                     |
| Tfeb    | MGI:103270  | Tfeb    | transcription factor EB                                                         |
| Tcof1   | MGI:892003  | Tcof1   | treacle ribosome biogenesis factor 1                                            |
| U2surp  | MGI:1915208 | U2surp  | U2 snRNP-associated SURP domain containing                                      |
| Uhrf1   | MGI:1338889 | Uhrf1   | ubiquitin-like, containing PHD and RING finger domains, 1                       |
| Ybx1    | MGI:99146   | Ybx1    | Y box protein 1                                                                 |
| Yeats2  | MGI:2447762 | Yeats2  | YEATS domain containing 2                                                       |

**Supplementary Table S5. 109 overlapping phosphopeptides from global and kinase assay phosphoproteomics**

| <b>GO Biological Process</b>                                            | <b>False Discovery Rate (FDR)</b> |
|-------------------------------------------------------------------------|-----------------------------------|
| gene expression                                                         | 1.41E-12                          |
| nucleic acid metabolic process                                          | 1.70E-12                          |
| macromolecule biosynthetic process                                      | 4.11E-12                          |
| regulation of nitrogen compound metabolic process                       | 4.11E-12                          |
| regulation of gene expression                                           | 1.19E-11                          |
| cellular macromolecule biosynthetic process                             | 1.19E-11                          |
| RNA metabolic process                                                   | 1.66E-11                          |
| cellular nitrogen compound metabolic process                            | 1.88E-11                          |
| cellular nitrogen compound biosynthetic process                         | 5.14E-11                          |
| regulation of RNA metabolic process                                     | 9.13E-11                          |
| regulation of cellular biosynthetic process                             | 1.10E-10                          |
| nucleobase-containing compound metabolic process                        | 1.37E-10                          |
| cellular macromolecule metabolic process                                | 1.37E-10                          |
| regulation of nucleobase-containing compound metabolic process          | 2.40E-10                          |
| regulation of macromolecule biosynthetic process                        | 2.70E-10                          |
| transcription, DNA-templated                                            | 3.35E-10                          |
| regulation of cellular macromolecule biosynthetic process               | 3.65E-10                          |
| macromolecule metabolic process                                         | 9.57E-10                          |
| nucleobase-containing compound biosynthetic process                     | 1.37E-09                          |
| regulation of metabolic process                                         | 1.46E-09                          |
| regulation of macromolecule metabolic process                           | 1.83E-09                          |
| regulation of primary metabolic process                                 | 1.87E-09                          |
| regulation of cellular metabolic process                                | 2.11E-08                          |
| regulation of transcription from RNA polymerase II promoter             | 7.71E-08                          |
| negative regulation of nitrogen compound metabolic process              | 0.000000188                       |
| chromosome organization                                                 | 0.00000113                        |
| negative regulation of nucleobase-containing compound metabolic process | 0.00000122                        |
| regulation of cellular process                                          | 0.00000217                        |
| cellular process                                                        | 0.00000249                        |
| negative regulation of cellular process                                 | 0.00000249                        |
| negative regulation of macromolecule metabolic process                  | 0.00000249                        |

|                                                                      |            |
|----------------------------------------------------------------------|------------|
| primary metabolic process                                            | 0.00000249 |
| negative regulation of cellular metabolic process                    | 0.0000025  |
| cellular metabolic process                                           | 0.0000025  |
| negative regulation of cellular macromolecule biosynthetic process   | 0.00000269 |
| regulation of mRNA processing                                        | 0.00000304 |
| negative regulation of gene expression                               | 0.00000419 |
| negative regulation of RNA metabolic process                         | 0.00000562 |
| organic substance metabolic process                                  | 0.00000668 |
| organelle organization                                               | 0.00000892 |
| mRNA processing                                                      | 0.0000129  |
| chromatin organization                                               | 0.0000144  |
| positive regulation of cellular process                              | 0.0000165  |
| positive regulation of metabolic process                             | 0.000022   |
| positive regulation of biological process                            | 0.0000282  |
| regulation of biological process                                     | 0.000037   |
| cellular component organization                                      | 0.0000521  |
| regulation of mRNA splicing, via spliceosome                         | 0.0000619  |
| biological regulation                                                | 0.0000722  |
| RNA splicing                                                         | 0.0000941  |
| positive regulation of macromolecule metabolic process               | 0.0000969  |
| positive regulation of cellular metabolic process                    | 0.000101   |
| metabolic process                                                    | 0.00011    |
| RNA processing                                                       | 0.000127   |
| negative regulation of transcription from RNA polymerase II promoter | 0.000134   |
| chromatin modification                                               | 0.000162   |
| negative regulation of transcription, DNA-templated                  | 0.000162   |
| cell cycle process                                                   | 0.000283   |
| positive regulation of transcription from RNA polymerase II promoter | 0.000297   |
| positive regulation of transcription, DNA-templated                  | 0.000348   |
| regulation of cell cycle                                             | 0.000417   |
| positive regulation of cellular biosynthetic process                 | 0.000425   |
| cell cycle                                                           | 0.000435   |

|                                                                                              |          |
|----------------------------------------------------------------------------------------------|----------|
| positive regulation of nitrogen compound metabolic process                                   | 0.000462 |
| negative regulation of mRNA splicing, via spliceosome                                        | 0.00055  |
| positive regulation of gene expression                                                       | 0.000969 |
| single-organism organelle organization                                                       | 0.00104  |
| transcription from RNA polymerase II promoter                                                | 0.00134  |
| positive regulation of macromolecule biosynthetic process                                    | 0.00155  |
| negative regulation of cell cycle                                                            | 0.00177  |
| single-organism developmental process                                                        | 0.00201  |
| hematopoietic or lymphoid organ development                                                  | 0.00201  |
| regulation of cellular component organization                                                | 0.00228  |
| positive regulation of nucleobase-containing compound metabolic process                      | 0.00241  |
| anatomical structure development                                                             | 0.00264  |
| immune system development                                                                    | 0.00289  |
| biological_process                                                                           | 0.00313  |
| erythrocyte differentiation                                                                  | 0.00338  |
| histone modification                                                                         | 0.00446  |
| TOR signaling                                                                                | 0.00519  |
| homeostasis of number of cells                                                               | 0.00535  |
| immune system process                                                                        | 0.00535  |
| DNA metabolic process                                                                        | 0.0062   |
| positive regulation of protein deacetylation                                                 | 0.00884  |
| positive regulation of protein metabolic process                                             | 0.00975  |
| DNA replication                                                                              | 0.0101   |
| mitotic cell cycle process                                                                   | 0.0108   |
| DNA conformation change                                                                      | 0.0114   |
| cell differentiation                                                                         | 0.013    |
| cellular developmental process                                                               | 0.0136   |
| positive regulation of cellular protein metabolic process                                    | 0.0136   |
| regulation of lipid transport by regulation of transcription from RNA polymerase II promoter | 0.0137   |
| mitotic cell cycle                                                                           | 0.014    |
| nuclear division                                                                             | 0.014    |
| regulation of cell cycle process                                                             | 0.014    |

|                                                                        |        |
|------------------------------------------------------------------------|--------|
| response to osmotic stress                                             | 0.0144 |
| regulation of organelle organization                                   | 0.015  |
| positive regulation of protein modification process                    | 0.0153 |
| translational initiation                                               | 0.0161 |
| single-multicellular organism process                                  | 0.0173 |
| hemopoiesis                                                            | 0.0173 |
| multicellular organismal development                                   | 0.0189 |
| system development                                                     | 0.0191 |
| DNA packaging                                                          | 0.0198 |
| apoptotic chromosome condensation                                      | 0.0204 |
| cellular response to stimulus                                          | 0.0204 |
| regulation of transcription elongation from RNA polymerase II promoter | 0.0204 |
| lung development                                                       | 0.0264 |
| positive regulation of DNA metabolic process                           | 0.0281 |
| respiratory tube development                                           | 0.0283 |
| chromosome segregation                                                 | 0.0289 |
| tube development                                                       | 0.0436 |
| in utero embryonic development                                         | 0.0468 |
| histone ubiquitination                                                 | 0.048  |
| single-organism cellular process                                       | 0.0495 |

**Supplementary Table S6. Enriched GO Biological Processes in 109 overlapping phosphopeptides**

|                      | Patient ID | PDX ID | AS1842856    |          | Idarubicin   |          |
|----------------------|------------|--------|--------------|----------|--------------|----------|
|                      |            |        | IC50 Log[nM] | IC50(nM) | IC50 Log[nM] | IC50(nM) |
| <b>DS-ALL</b>        | DS-2818    | 124    | 2.18         | 151.36   | 0.56         | 3.63     |
|                      | DS-ALL01   | 365    | 1.96         | 91.11    | 2.03         | 106.39   |
|                      | DS-16013   | 408    | 2.28         | 191.57   | 1.98         | 95.17    |
|                      | DS-4366    | 1450   | 2.23         | 171.45   | 0.90         | 7.88     |
| <b>HeH-ALL</b>       | DOS        | 148    | 1.69         | 48.76    | 0.51         | 3.23     |
|                      | HD-21093   | 859    | 2.78         | 607.88   | 1.81         | 63.91    |
|                      | HD-14207   | 881    | 1.86         | 72.70    | 1.89         | 77.35    |
|                      | HD-12206   | 907    | 2.58         | 378.74   | 1.75         | 56.64    |
|                      | HD-18082   | 909    | 2.26         | 180.13   | 1.39         | 24.62    |
| <b>B-ALL (Other)</b> | F18        | m1009  | 2.27         | 188.14   | 0.72         | 5.24     |
|                      | SN10       | m1086  | 1.83         | 67.48    | 0.57         | 3.71     |
|                      | ZH61a      | m1225  | 2.06         | 115.46   | 0.69         | 4.95     |
|                      | L2         | m1339  | 2.80         | 627.42   | 0.71         | 5.19     |
|                      | E55        | m1759  | 2.22         | 167.40   | 0.72         | 5.21     |

**Supplementary Table S7. AS1842856 and Idarubicin IC50 values in ALL patient cells**

| <b>PDX Sample ID</b> | <b>Alias</b> | <b>Tumor Type</b> | <b>Tumor Subtype</b> | <b>Patient Age</b> | <b>Driving Lesion</b> | <b>Other Gene Alterations</b> |
|----------------------|--------------|-------------------|----------------------|--------------------|-----------------------|-------------------------------|
| SJBALL021964_D1      | TB-10-1926   | B-ALL             | Ph-like              | 6                  | P2RY8-CRLF2           | EBF1, IKZF1, RAG1/2, BTG1     |
| SJBALL265_D1         | PANNGL       | B-ALL             | Ph-like              | 12                 | PAX5-JAK2             | IKZF1, SETD2                  |

**Supplementary Table S8. Background information of human PDX-passaged Ph-like ALL samples**



| Antigen                                     | Source                    | Clone      | Catalog number   |
|---------------------------------------------|---------------------------|------------|------------------|
| <b>Antibodies used for flow cytometry</b>   |                           |            |                  |
| B220                                        | BD                        | RA3-6B2    | 553087           |
| CD43                                        | BD                        | S7         | 562866           |
| IgM                                         | eBioscience               | II/41      | 48-5790-82       |
| CD19                                        | eBioscience               | eBio1D3    | 17-0193-82       |
| Annexin V                                   | BD                        | DX2        | 556421           |
| CD19 (human)                                | eBioscience               | HIB19      | 25-0199-42       |
| CD45 (human)                                | eBioscience               | 2D1        | 17-9459-42       |
| Gamma-H2AX                                  | BD                        | N1-431     | 560447           |
| Phospho-CDK1 (phospho-cdc2) Y15             | Cell Signaling Technology | 10A11      | 4539S            |
| Rabbit IgG                                  | Abcam                     | Polyclonal | Ab175470         |
| <b>Antibodies used for Western blotting</b> |                           |            |                  |
| DYRK1A                                      | Abnova                    | 7D10       | H00001859-M01    |
| Cyclin D3                                   | Santa Cruz Biotechnology  | C-16       | sc-182-G         |
| Phospho-Cyclin D3 T283                      | Abcam                     | Polyclonal | ab55322          |
| Phospho-Cyclin D3 T283                      | Cell Signaling Technology | E1V6W      | 53966S           |
| FOXO1                                       | Cell Signaling Technology | C29H4      | 2880, 76764      |
| Phospho-FOXO1 S329                          | Aviva Systems Biology     | Polyclonal | OAAF07382-Biotin |
| TBP                                         | Cell Signaling Technology | D5C9H      | 44059            |
| STAT3                                       | Cell Signaling Technology | 124H6      | 9139S            |
| Phospho-STAT3 Y705                          | Cell Signaling Technology | D3A7       | 9145, 4093       |
| Phospho-STAT3 S727                          | Cell Signaling Technology | D8C2Z      | 49081S           |
| HSC70                                       | Santa Cruz Biotechnology  | B-6        | sc-7298          |
| Beta-Actin                                  | Santa Cruz Biotechnology  | C4         | sc-47778         |
| Rabbit IgG (HRP-conjugated)                 | GE Healthcare             | Polyclonal | NA934            |
| Mouse IgG (HRP-conjugated)                  | GE Healthcare             | Polyclonal | NA931            |
| Biotin (HRP-conjugated)                     | ThermoFisher Scientific   | N/A        | SA10001          |
| Biotin (IRDye 680RD Streptavidin)           | LI-COR                    | N/A        | 68079            |
| Biotin (IRDye 800CW Streptavidin)           | LI-COR                    | N/A        | 32230            |
| Rabbit IgG (IRDye 680RD)                    | LI-COR                    | Polyclonal | 68071            |
| Mouse IgG (IRDye 800CW)                     | LI-COR                    | Polyclonal | 32213            |
| Anti-thiophosphate ester                    | Abcam                     | 51-8       | ab92570          |
| <b>Anti-mouse lineage panel</b>             |                           |            |                  |
| CD3                                         | BioLegend                 | 145-2C11   | 133307           |
| Ly-6G/Ly-6C                                 |                           | RB6-8C5    |                  |
| CD11b                                       |                           | M1/70      |                  |
| CD45R                                       |                           | RA3-6B2    |                  |
| TER-119                                     |                           | Ter-119    |                  |

**Supplementary Table S9. Antibody information**
